# Genome Sequencing Unveils a Novel *Sea* Enterotoxin-Carrying PVL Phage in *Staphylococcus aureus* ST772 from India

Sushma Prabhakara<sup>1</sup>, Supriya Khedkar<sup>2</sup>, Srikanth Mairpady Shambat<sup>4</sup>, Rajalakshmi Srinivasan<sup>2</sup>, Atanu Basu<sup>3</sup>, Anna Norrby-Teglund<sup>4</sup>, Aswin Sai Narain Seshasayee<sup>2\*</sup>, Gayathri Arakere<sup>1\*</sup>

**1** Society for Innovation and Development, Indian Institute of Science, Bengaluru, India, **2** National Centre for Biological Sciences, TIFR, GKVK, Bengaluru, India, **3** National Institute of Virology, Pune, India, **4** Karolinska Institute, Center for Infectious Medicine F59, Karolinska University Hospital, Huddinge, Stockholm, Sweden

## Abstract

*Staphylococcus aureus* is a major human pathogen, first recognized as a leading cause of hospital-acquired infections. Community-associated *S. aureus* (CA-SA) pose a greater threat due to increase in severity of infection and disease among children and healthy adults. CA-SA strains in India are genetically diverse, among which is the sequence type (ST) 772, which has now spread to Australia, Europe and Japan. Towards understanding the genetic characteristics of ST772, we obtained draft genome sequences of five relevant clinical isolates and studied the properties of their PVL-carrying prophages, whose presence is a defining hallmark of CA-SA. We show that this is a novel prophage, which carries the structural genes of the *hly*-carrying prophage and includes the *sea* enterotoxin. This architecture probably emerged early within the ST772 lineage, at least in India. The *sea* gene, unique to ST772 PVL, despite having promoter sequence characteristics typical of low expression, appears to be highly expressed during early phase of growth in laboratory conditions. We speculate that this might be a consequence of its novel sequence context. The crippled nature of the *hly*-converting prophage in ST772 suggests that widespread mobility of the *sea* enterotoxin might be a selective force behind its 'transfer' to the PVL prophage. Wild type ST772 strains induced strong proliferative responses as well as high cytotoxic activity against neutrophils, likely mediated by superantigen SEA and the PVL toxin respectively. Both proliferation and cytotoxicity were markedly reduced in a cured ST772 strain indicating the impact of the phage on virulence. The presence of SEA alongside the genes for the immune system-modulating PVL toxin may contribute to the success and virulence of ST772.

**Citation:** Prabhakara S, Khedkar S, Shambat SM, Srinivasan R, Basu A, et al. (2013) Genome Sequencing Unveils a Novel *Sea* Enterotoxin-Carrying PVL Phage in *Staphylococcus aureus* ST772 from India. PLoS ONE 8(3): e60013. doi:10.1371/journal.pone.0060013

**Editor:** Michael Otto, National Institutes of Health, United States of America

**Received:** October 4, 2012; **Accepted:** February 20, 2013; **Published:** March 27, 2013

**Copyright:** © 2013 Prabhakara et al. This is an open-access article distributed under the terms of the Creative Commons Attribution License, which permits unrestricted use, distribution, and reproduction in any medium, provided the original author and source are credited.

**Funding:** SP is a junior research fellow under BT/IN/New Indigo/16/GA/2010. SK is supported by fellowship [09/860(0122)/2011-EMR-I] from the Council for Scientific & Industrial Research (CSIR), India. ASNS is funded by the NCBS core budget and the Ramanujan Fellowship (SR/S2/RJN-49/2010) from the Department of Science and Technology, Government of India. GA is funded by Department of Biotechnology (BT/IN/New Indigo/16/GA/2010) and Swedish International Development Agency funding to ANT and GA. The funders had no role in study design, data collection and analysis, decision to publish, or preparation of the manuscript.

**Competing Interests:** The authors have declared that no competing interests exist.

\* E-mail: aswin@ncbs.res.in (ASNS); gayathri.arakere@gmail.com (GA)

## Introduction

*Staphylococcus aureus* (SA) is an important bacterial pathogen of humans. It has been a major causative agent of hospital-acquired (HA) bacterial infections. It is also known for its ability to be resistant to multiple antibiotics, methicillin-resistant *S. aureus* (MRSA) being an important example [1]. Recently however, various isolates of community-associated (CA) *S. aureus* have been reported, thus widely extending the reservoirs of *S. aureus* infections. CA-SA strains (CA-MRSA in particular) lead to a range of simple to life-threatening skin and soft-tissue infections (SSTI) and severe abscesses, sepsis, and necrotizing pneumonia [2]. Virulence and antibiotic resistance – the two important characteristics of *S. aureus* – are generally associated with various mobile genetic elements (MGE), including several prophages and the Staphylococcal Cassette Chromosome *mec* (*SCCmec*), which carries determinants of antibiotic resistance [3] along with other chromosomal regulators of virulence like the *agr* system. Early comparative studies showed that among prophages, one that

carries the Panton-Valentine Leukocidin (PVL) toxin is a particular hallmark of CA-SA strains [4,5].

The PVL-carrying prophages are temperate bacteriophages belonging to the family *Siphoviridae*, which are ds-DNA phages with long non-contractile tail. These are *sfi21*-like *cos*-site phages and belong to one of three groups based on capsid morphology: group 1 ( $\phi$ PVL,  $\phi$ 108PVL), group 2 ( $\phi$ Sa2958,  $\phi$ Sa2MW,  $\phi$ SLT,  $\phi$ Sa2USA) or group 3 ( $\phi$ 7247,  $\phi$ 5967,  $\phi$ M013). The PVL toxin itself is a bi-component, hetero-oligomeric, pore-forming cytolytic toxin comprising LukF-PV (34 kDa) and LukS-PV (33 kDa) [6–9]. The role of this toxin in virulence is controversial. For example, studies in rabbit infection models have suggested that PVL, though being a contributing player, could not be a major factor driving CA-MRSA infections [10,11]. Nevertheless, it has been shown that PVL lyses human white blood cells. However, its effects are concentration dependent. At sublytic concentrations, PVL enhances innate host immunity without cell damage [12,13]. A recent study has further demonstrated that PVL is the major

trigger for IL-1 $\beta$  release and inflammasome activation from human macrophages [14].

The best-studied CA-MRSA strains are from the USA and are named USA300, which is highly clonal and PVL-positive. Nearly all (97%) MRSA skin infections in patients reporting emergencies in the USA are due to USA300 [15]. However, in contrast, CA-MRSA isolates from India are genetically diverse and nearly three-fourths are PVL-positive. These belong to two ST types: ST22 and ST772 [16–18]. While ST22 originated in England, ST772 is present mainly in India, Bangladesh and Malaysia, and has been called the Bengal Bay clone by some investigators [16,19,20]. But in the last couple of years, the latter has been reported from England, Ireland and Japan [21–23]. A recent German study, of *S. aureus* in individuals who had returned from travel to the tropics and the sub-tropics, showed that complex SSTIs were associated with PVL-positive *S. aureus* and that ST772 was predominant in individuals returning from Asia [24]. Despite this knowledge, these strains remain poorly characterized at the genetic and the molecular level.

Here we present the draft genome sequence of several ST772 isolates collected from different clinical settings, and discuss the sequence and structure of their PVL-carrying phages (with the generic name  $\phi$ IND772PVL) [25]. The phage sequences from the five different ST772 isolates are identical. The  $\phi$ IND772PVL is similar to the PVL phage from ST59 isolates ( $\phi$ 7247PVL and  $\phi$ 5967PVL for example) in that they are both mosaics including aspects of the *hly*-converting phage. However, the  $\phi$ IND772PVL is unique in carrying the staphylococcal enterotoxin (*sea*) gene. We suggest that the *sea*-carrying PVL phage emerged early on within the ST772 lineage in India, on the basis of the absolute presence of the *sea* within the PVL-carrying prophage in every ST772 isolate in our collection.

## Results

### PVL-carrying Phages in *S. aureus* ST772

Our collection of *S. aureus* samples from India has 45 PVL-positive ST772 strains of which 39 are disease isolates and the remaining carrier strains. On the basis of a previous publication, we performed several PCR reactions to classify the PVL phages from our ST772 collection into two types describing whether the genetic structure supports an icosahedral or an elongated capsid. These PCR reactions are based on sequences from the following five PVL phages:  $\phi$ 108PVL,  $\phi$ PVL,  $\phi$ Sa2958,  $\phi$ Sa2MW,  $\phi$ SLT [8]. PCR was also carried out in our isolates for detection of  $\phi$ Sa2USA (PVL phage in USA300) signatures, as described in an earlier publication [21]. Our results show that none of our ST772 isolates could be reconciled with any of the above PVL phages (Table 1). On the other hand, 17 out of 19 ST22 (EMRSA-15) isolates were  $\phi$ PVL-like (data not shown). Recently, Zhang et al isolated and sequenced a PVL phage called  $\phi$ 7247PVL from *S. aureus* ST59 carrying a SCC $mec$  type V element [9]. By performing PCR reactions, we observed that our ST772 phages were positive for several genes from  $\phi$ 7247PVL (Figure S1). However, regions of similarity were mainly restricted to the structural genes (*cap* and *por*), with variation in the lysogeny (*ant*) region. We then performed transmission electron microscopy of the PVL phage from ST772 (Fig. 1), which appears to have a quasi icosahedral head  $\sim$ 54 nm in size and an  $\sim$ 180 nm-long tail. The overall morphology of the virions is typical of the family *Siphoviridae*. Taken together, these results led us to believe that ST772 PVL phages are different from other known PVL-encoding phages, at least in their genetic architecture, if not in their morphology.

### Genome Sequencing of Clinical Isolates of *S. aureus* ST772

Towards understanding the genetic characteristics of *S. aureus* ST772, we sequenced the genomic DNA of five isolates from different clinical settings: a carrier, and patients with pyomyositis, endophthalmitis, cerebral abscess and pneumonitis (with ID # 60, 118, 333, 120 and 3989) respectively, all typed previously as ST772 [16,18]. The raw reads obtained from an Illumina HiSeq-1000 sequencer were assembled into contigs using VELVET, and gene predictions made using GLIMMER. The total size of the assemblies and the number of ORFs predicted are consistent with numbers expected from *S. aureus* (Table S1). Mapping of raw sequence reads back to the assemblies estimated insert size distributions that are comparable to that obtained for a control sequencing run, in which reads obtained from USA300 were mapped back to its fully sequenced reference genome (Figure S2). Preliminary comparative analysis of these genomes, in the context of other fully sequenced *S. aureus* genomes, show that the various ST772 genomes form a tight clade, but with each genome carrying a few unique genes (data not shown). Full comparative genomics analysis of these isolates will be presented elsewhere.

### Comparative Analysis of the Sequence of the PVL-carrying Phage in *S. aureus* ST772

To elucidate the genetic characteristics of the PVL-carrying phage in *S. aureus* ST772 ( $\phi$ IND772PVL), we used previously published flanking site information to extract its complete sequence from our contigs [21]. These data are available at [http://www.bugbears.in/staph\\_772\\_pvl](http://www.bugbears.in/staph_772_pvl) and in Table S2. The 29-bp core sequences located at both ends matched with those in  $\phi$ 7247PVL with 90% sequence identity. The 25-bp sequences of the *attB* site (*attB-L* and *attB-R*) were identified at both ends of  $\phi$ IND772PVL (Table S2). The 25-bp phage attachment sites *attP-L* and *attP-R* had 92% and 100% sequence identity respectively with  $\phi$ 7247PVL. In each case, the entire  $\sim$ 43 kb PVL phage was contained within a single contig. G+C content of the whole prophage sequence is 33.4%, which is comparable to that of the whole *S. aureus* genome.

We identified 66 ORFs (Table S2) within the  $\phi$ IND772PVL prophage, which could be organized into five contiguous modules, in a manner similar to other PVL phages: (1) lysogeny module, (2) DNA replication/transcriptional regulation module, (3) Structural (packaging, head, tail) module (4) lysis module (5) toxin element (*lukS-PV* and *lukF-PV*). The lysogeny module consists of the integrase gene, which mediates site-specific integration of the phage genome into the bacterial chromosome. The lysogeny control region encodes genes for the *cI* and *cro*-like repressors as well as the anti-repressor. Adjacent to these are two genes of unknown function but with strong similarity to hypothetical genes predicted in the genome of *Staphylococcus haemolyticus*. In the replication module, we identified a transcriptional regulator, a single-stranded DNA binding protein, a few other phage replication proteins and a dUTPase, among several proteins of unknown function. The structural gene set included genes encoding the phage terminase major subunit, the S14 family endopeptidase ClpP, the phage major capsid protein, phi13 family major tail protein, the phage tail tape measure protein and phage minor structural protein, among several other hypothetical proteins. The lysis module encodes genes for holin and amidase (endolysin), which contribute to the final step of the bacteriophage lytic life cycle. Finally, the  $\phi$ IND772PVL encodes both PVL toxin components, LukS-PV and LukF-PV.

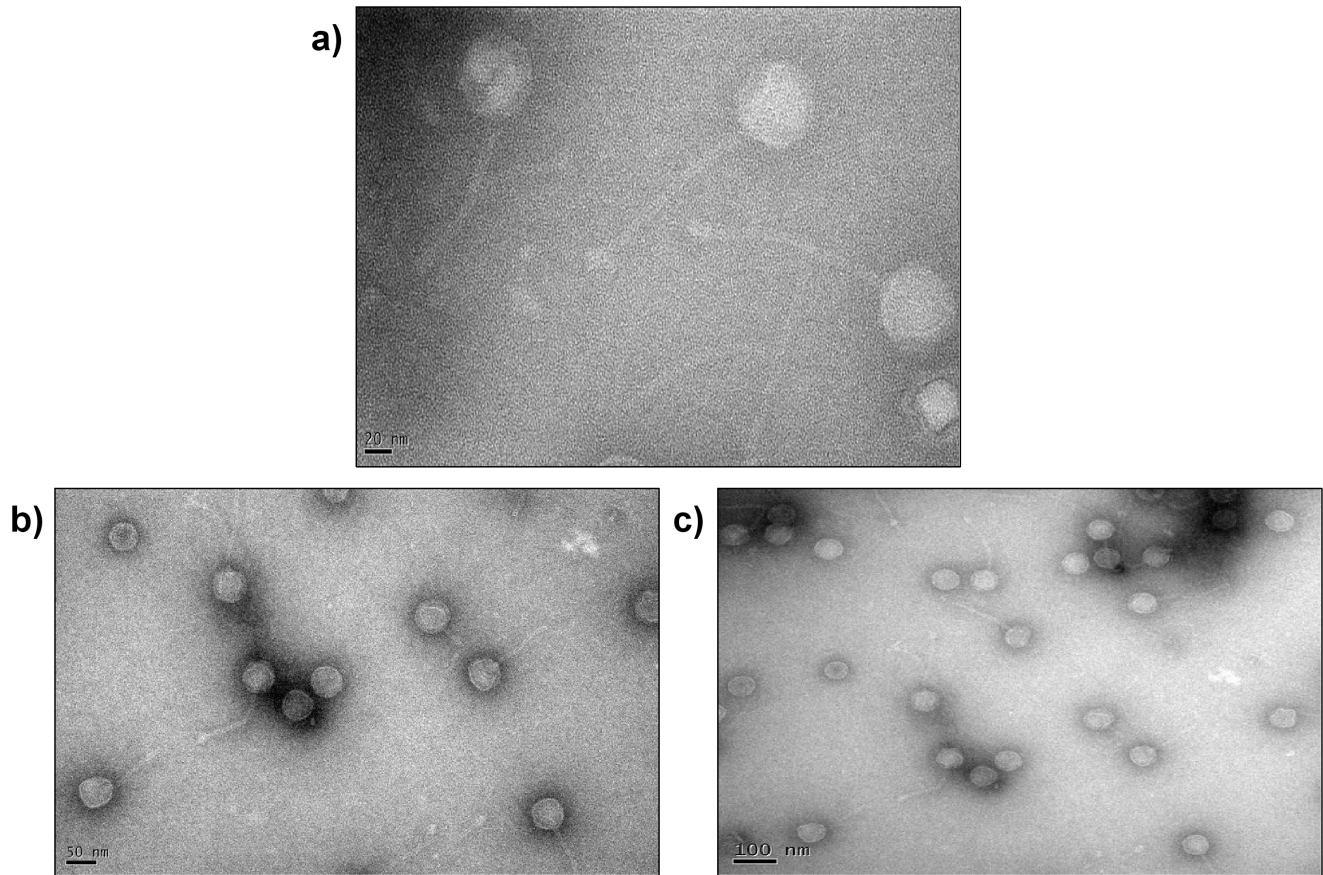

**Figure 1. Negatively stained Transmission Electron Micrographs of  $\phi$ IND772PVL.**  
doi:10.1371/journal.pone.0060013.g001

Dot plot comparisons of the whole sequence of the  $\phi$ IND772PVL with other sequenced PVL phages suggested considerable novelty (Fig. 2a). As suggested by the PCR experiments described above, the  $\phi$ IND772PVL is most similar to PVL phages from *S. aureus* ST59 ( $\phi$ 7247PVL for example), but regions of novelty could be detected even in this comparison.

Comparison of the sequences of the  $\phi$ IND772PVL ORFs to similarly predicted ORF sequences in other *S. aureus* phages show that the PVL-carrying phages are highly divergent from each other and spread across the clustering-based tree (Fig. 2b). However, the  $\phi$ IND772PVL phages cluster with the PVL-carrying phages from ST59 as the two sequence types share many one-to-one bidirectional best-hit orthologs (>90% sequence similarity; Figs. 2b and S3). These similarities are striking in the structural module. Two other PVL-carrying phages ( $\phi$ 108PVL and  $\phi$ PVL-CN125), which cluster alongside the ST772 and ST59 phages, share few orthologs in the structural genes, but have higher similarity in the replication module (Figs. 2b, S3 and S4); however, it must be noted that several non-PVL-carrying *S. aureus* phages also share orthologs of genes from this region of the  $\phi$ IND772PVL sequence (Fig. 2b).

#### Presence of the *Sea* Enterotoxin Gene in the PVL-carrying Phage in *S. aureus* ST772

Compared to all other sequenced PVL phages, including those from ST59,  $\phi$ IND772PVL encodes the following novelty: it carries the *sea* enterotoxin gene at the end of the structural module, before the beginning of the lysis and the toxin modules. A genomic map,

showing the linkage between *sea* and the PVL toxin genes, is shown in Fig. 2c. In other *S. aureus* isolates, the *sea* enterotoxin gene is normally carried as part of the *hlyB*-converting ( $\beta$ C- $\phi$ s) phage such as  $\phi$ NM3, whose structural genes share homology with those in the PVL phage in ST772 and ST59. In  $\phi$ NM3, as in  $\phi$ IND772PVL, the *sea* gene is located adjacent to the structural genes. Thus, a single event might have been responsible for the transfer of the structural genes as well as *sea* to the PVL-carrying phage in ST772. PCR analysis of 45 ST772 and 43 non-ST772 isolates from our collection, using one primer derived from the *sea* locus and another from the PVL toxin module, shows that the *sea* is encoded in the PVL phage in every ST772 isolate, but not in any other isolate (Figs. 2d and S5). This indicates that this genetic structure has probably emerged early and unique to the ST772 lineage among Indian isolates.

#### The Nature of the *hlyB*-converting Phage in *S. aureus* ST772

*hlyB*-converting phages are not known to encode the PVL toxin. Our results suggest that the structural genes of the PVL-carrying phages in ST772 and ST59 might have been acquired from *hlyB*-converting phages. Given the geographic separation and the genetic distance between these two sequence types of *S. aureus*, we surmise that a possible recombination event occurred independently in the two lineages. ST59 does not appear to contain any integrated, extant *hlyB*-converting prophage, as shown by a study of the genome of *S. aureus* M013. Thus ST59 has an intact *hlyB* gene, which carries the insertion site for the *hlyB* converting phage. On

**Table 1.** Characterization of PVL phages from ST772 isolates.

| ST (No. of isolates) | MRSA/MSSA N/N | Integrase type | Morphology PCR 1/2<br>Icosahedral/Elongated | Lineage PCR 3/4<br>Icosahedral/Elongated | Phage type PCR 5, 6, 7 & 8/φSa2USA | Remarks |
|----------------------|---------------|----------------|---------------------------------------------|------------------------------------------|------------------------------------|---------|
| ST772 (45)           | 35/2          | 2              | -                                           | -                                        | -                                  | UD*     |
|                      | 1/0           | 2              | -                                           | -                                        | φ PVL                              | UD      |
|                      | 1/0           | 2              | -                                           | -                                        | φ 108PVL                           | UD      |
|                      | 1/0           | 2,3            | -                                           | -                                        | -                                  | UD      |
|                      | 1/0           | 2,3            | Elongated                                   | -                                        | φ PVL                              | UD      |
|                      | 0/1           | 2,3            | Elongated                                   | -                                        | -                                  | UD      |
|                      | 1/0           | 1,2            | -                                           | -                                        | -                                  | UD      |
|                      | 0/1           | 1,2,3          | -                                           | -                                        | -                                  | UD      |
|                      | 0/1           | 2,3,7          | -                                           | -                                        | -                                  | UD      |

\*UD: Undetermined.

Series of 8 PCRs (1–8) were carried out to identify the two morphological types of PVL-carrying prophages as described by Ma et al. [8] PCR1- primers specific for icosahedral portal and tail gene, 2- elongated portal and tail gene, 3- Lineage of *lukS-PV* with the tail gene of icosahedral type, 4- Lineage of *lukS-PV* with the tail gene of elongated type, 5, 6, 7, 8 - Phage type specific PCRs for φ108PVL and φ PVL, φ Sa2958, φ Sa2MMW and φ SLT respectively. Phage type specific PCR for φ Sa2USA was carried out as described by Boakes et al [21].  
doi:10.1371/journal.pone.0060013.t001

the other hand, ST772 encodes only a ~3 kb relic of this prophage, as opposed to ~40 kb of a typical *hlyB*-converting prophage (Fig. 2e). The remnant of the *hlyB*-converting phage in *S. aureus* ST772 encodes *scn* (staphylococcal complement inhibitor) and two conserved hypothetical phage proteins. This is unique, as none of the previously known immune evasion clusters of the *hlyB*-containing prophage, despite being highly variable, is known to carry only the *scn* gene [26].

### Transcript Levels of *sea* and *lukS-PV* in ST772

We quantified the transcript levels of both *sea* and *lukS-PV* in ST772 isolates relative to several other *S. aureus* strains: Newman (carrying only *sea* on a *hlyB* converting phage), reported to have an 'intermediate' expression level of *sea*; MW2 (carrying *PVL* on a PVL phage and *sea* on a *hlyB* phage), with *sea* expression level expected to be higher than in Newman; and USA300 (carrying only *PVL* on a PVL phage, but no *sea* gene). Growth curves of all isolates, showing that there is no difference in growth rates is presented in Figure S6. The expression levels of *sea* and *lukS-PV* in each strain are normalized to that of MW2. In all the three ST772 isolates, *sea* is expressed at significantly higher levels at 3 hr compared to both Newman and MW2 ( $P < 0.0001$ ). *sea* expression is reduced and differ among the various isolates at later time points. On the other hand, *lukS-PV* appears to be expressed in ST772 (118) at significantly higher levels, when compared to MW2 and USA300, at 7 hr (post exponential phase) ( $P < 0.0001$ ) (Figs. 3a and 3b). To test whether these expression patterns could be caused by the quorum-sensing regulator of virulence, *agr*, we performed RT-qPCR against *RNIII*, a key effector of the *agr* system, using *rpoC* as an internal control. *RNIII* levels vary among all isolates at all time points, with the expression level being lowest at 3 hr and increasing after 5 hr (Fig. 4), reflecting the *agr*-dependent expression of PVL and *agr*-independent expression of *sea* [27,28]. In order to verify translation of *sea* into protein and its secretion into the medium, we tested the expression levels of SEA in supernatants of 3, 9 and 18 hr grown cultures by performing Western blots using a commercially available rabbit SEA antibody and anti rabbit IgG conjugated to horse radish peroxidase. All ST772 isolates produce SEA protein with two of the ST772 s making as much SEA as MW2, whereas Newman had the lowest SEA among all of them (Figs. 3c and 3d). SEA was not detected in the 3 hr supernatant (not yet secreted) while the 9 hr supernatant had detectable levels, and the 18 hr supernatant had substantial levels of SEA.

However, analysis of the promoter sequence of *sea* in various sequenced isolates suggests that ST772 has characteristics of intermediate expression while MW2 that of high expression (Fig. 3e). But ST772 has two changes in the promoter region as indicated in Fig. 3e. It remains to be seen whether the high expression observed in our study is a consequence of the novel neighbourhood of the *sea* gene in the PVL-carrying phage or the two changes in the promoter [27].

### Functional Analyses of Wild Type and Phage-cured ST772 (118)

In order to test whether carriage of the *sea* containing PVL-prophage has an impact on bacterial virulence, strain 118 was cured from its prophage by mitomycin C induction. Curing of PVL phages were confirmed by PCR for the absence of *lukS-PV*, *sea*, *int*, *cap* and *por* genes in the cured strain. PFGE patterns of wild type and phage-cured strains were identical except for the presence of one extra large band of roughly 550 kb in the cured phage due to the loss of a *smal* site inside the PVL phage (picture not shown). Bacterial culture supernatants, containing secreted

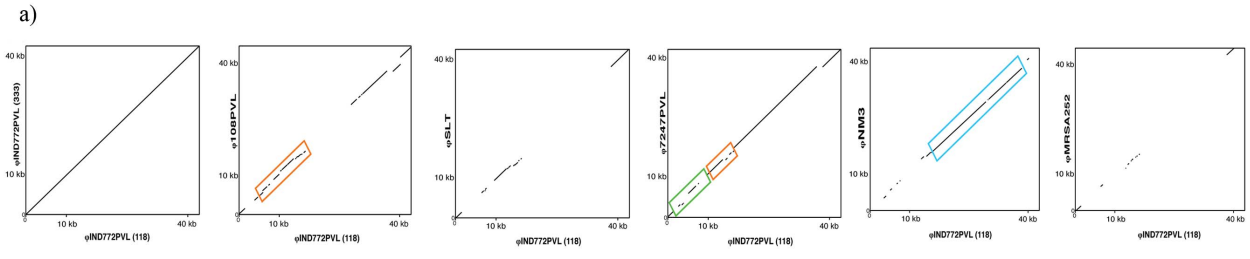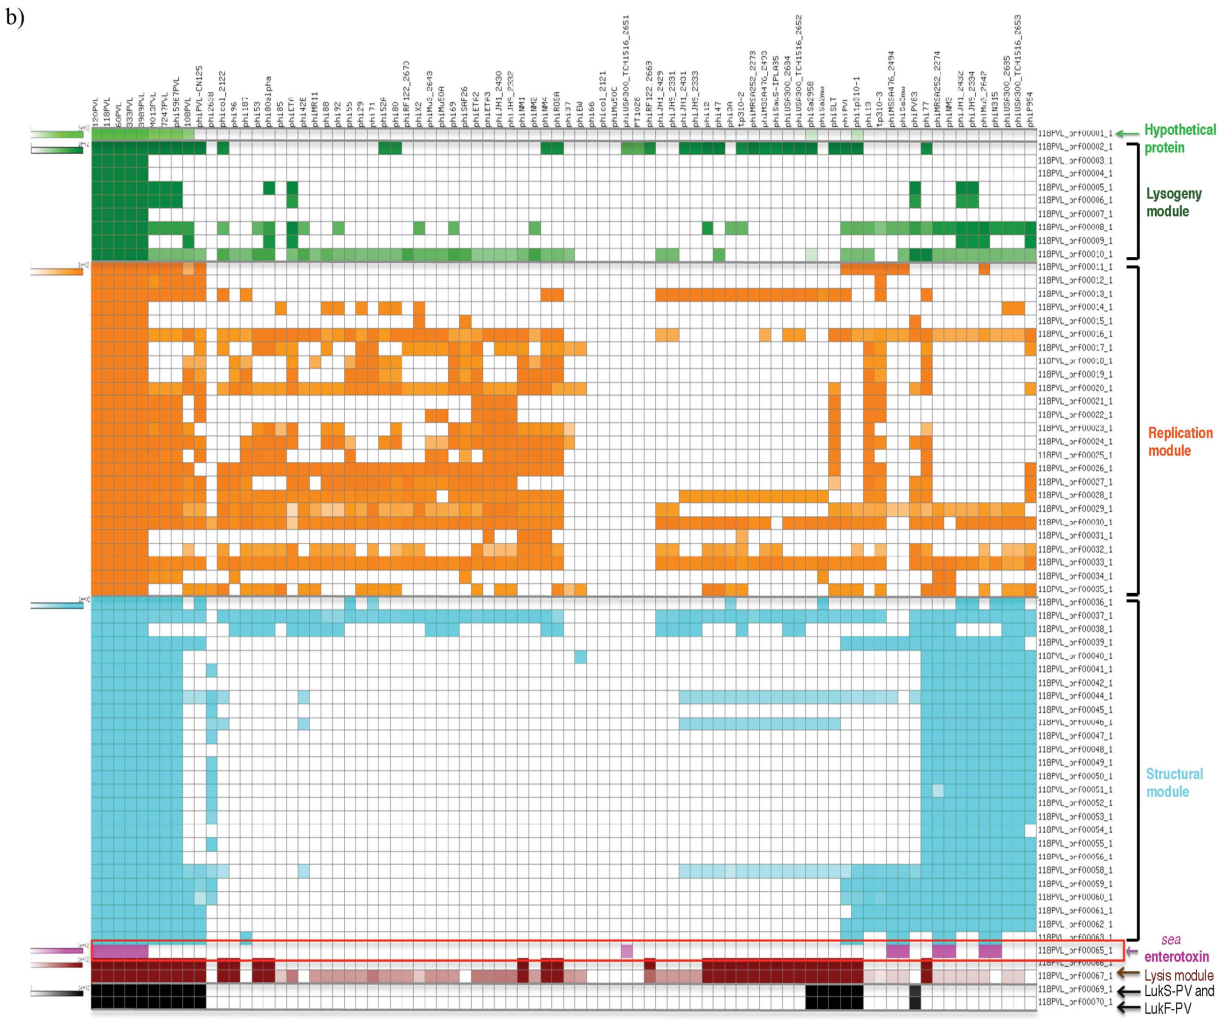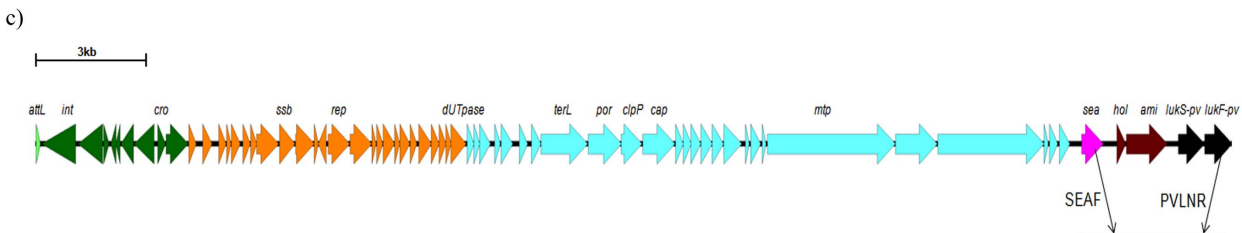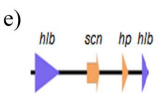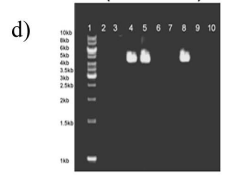



**Figure 2. Genomic characterization of  $\phi$ IND772PVL and comparison with other *S. aureus* phages.** (a) Dot-plot comparison of  $\phi$ IND772PVL (from strain 118) with each of the following phages:  $\phi$ IND772PVL (from strain 333),  $\phi$ 108PVL,  $\phi$ SLT,  $\phi$ 7247PVL,  $\phi$ NM3 and  $\phi$ MRSA252. The lines (drawn using EMBOSS with a window size of 230 and threshold of 100) on the plot represent similarity between any two phages being compared. Each color represents a module, as indicated in the figure. Various comparisons discussed in the main text are highlighted as follows: region of similarity in the replication module between  $\phi$ IND772PVL and  $\phi$ 108PVL; divergence between  $\phi$ IND772PVL and  $\phi$ 7247PVL in the lysogeny and the replication modules; similarity between  $\phi$ IND772PVL and the non-PVL-carrying  $\phi$ NM3 in the structural module." (b) Heat-map representing  $\phi$ IND772PVL (from strain 118) ORFs (represented on the vertical axis) and occurrence of their corresponding orthologs in other Staphylococcal PVL and non-PVL phages (represented on the horizontal axis). Genes are color coded as per the phage module they belong (marked in the figure). Intensity of the color is proportional to percent sequence similarity between any two orthologs as determined by Needleman-Wunsch global alignment. The *sea* enterotoxin gene has been highlighted by a red box. Note: The range of color intensities represented in the above heat-map is not very distinct due to high sequence similarity between most of the orthologs. (c) Genomic map of  $\phi$ IND772PVL. Primers used for linkage of *sea* and *lukF-PV* are indicated. Color coding for b and c: green represents a hypothetical protein upstream of the phage integrase marking the beginning of the lysogeny module, dark green: lysogeny module, orange: replication module, cyan: structural module, pink: enterotoxin (*sea*), reddish brown: lysis module and black: *lukS-PV* and *lukF-PV*. (d) Agarose gel picture of *sea-lukF-PV* linkage. PCR for representative strains: Lanes 1: 1 Kb DNA marker, 2: ST8, 3: ST22, 4, 5 and 8: ST772, 6: ST30, 7: ST121, 9: ST1208, 10: ST45. More data are available in SM 7. (e) Genomic map of truncated *hlyB*-converting phage in ST772: Genomic distance between  $\phi$ IND772PVL and *hlyB*-converting phage is about 0.4 Mb. doi:10.1371/journal.pone.0060013.g002

cytotoxins and superantigens, were prepared and used in functional assays. We assessed the superantigenic activity of the wild type and the cured strains by measuring <sup>3</sup>H-thymidine uptake in a proliferation assay using human peripheral blood mononuclear cells (PBMC). The results showed that the wild type strains induced a typical proliferative response with high proliferation evident over a broad concentration range (i.e. dilution range of 1:50 to 1:1000) (Fig. 5a). Comparison with two 118 strains that were cured from the prophage revealed a markedly reduced response at the 1:1000 dilution of the culture supernatant. To assess PVL mediated cell lysis, primary human neutrophils were exposed to bacterial culture supernatants and release of lactate dehydrogenase (LDH) was measured in the cell medium. The two cured strains had significantly reduced cytotoxic activity when compared to the wild type strain ( $p < 0.0001$ ) (Fig. 5b).

Thus, a 118 strain lacking  $\phi$ IND772PVL demonstrated reduced superantigenic and cytotoxic activity, when compared to the otherwise isogenic wild type strain.

## Discussion

Mobile genetic elements (MGE) play a major role in adaptation to stress by transferring genetic material within and between bacterial species. An example is the introduction of *SCCmec* into the Staphylococcal genome after the advent of methicillin [4]. *S. aureus* contains many different types of MGEs including plasmids, bacteriophages, pathogenicity islands, and transposons which carry genes encoding toxins and virulence factors, including the PVL-encoding genes (*lukS-PV* and *lukF-PV*) that can be carried by different phages. The role played by this toxin in the virulence of the organism has been most debated and controversial and is still not completely understood [12,13]. Epidemiologically, PVL has been implicated in deep-seated skin abscesses, furuncles and pneumonia but there are molecular studies contradicting this interpretation [11]. These results are confounded by the high levels of redundancy among putative virulence determinants in *S. aureus*.

We have identified and characterized a novel PVL-carrying phage,  $\phi$ IND772PVL from ST772 *S. aureus*. It is most similar to the PVL carrying phages from *S. aureus* ST59. However, the similarity is limited to the structural genes and to a lesser extent the replication module, with as many as 10 genes (15%) not having any detectable bidirectional best-hit ortholog in any other PVL-carrying phage, including those from the ST59 phages.

Analysis of the sequence of  $\phi$ IND772PVL prophage shows that it is unique in carrying *sea* in its genome. We also show that all ST772 isolates in our collection carry *sea* in the PVL-carrying phage suggesting that this organization developed early in the

emergence of the ST772 type in India. This could have emerged as a consequence of a recombination event between a PVL-carrying and a *hlyB*-converting phage. *hlyB*-converting phages typically carry *sea*, staphylokinase (*sak*), *scn* and chemotaxis inhibitory protein of *S. aureus* (*chp*); all of which are important virulence factors, in their "immune evasion cluster". However, the content of the immune evasion cluster is variable across strains. The immune evasion cluster in the heavily truncated *hlyB*-converting phage in ST772 isolates carries only *scn*, whose individual role in pathogenesis is unclear.

The novel *sea* containing  $\phi$ IND772PVL could play a significant role in bacterial virulence, as it encodes for two major virulence factors: (a) the PVL toxin itself; and (b) a potent superantigen SEA, known to induce strong pro-inflammatory responses contributing to severe systemic manifestations such as septic shock [27,29,30]. In ST772, *sea* appears to be highly expressed, despite having a promoter structure that has been previously demonstrated to be characteristic of low and intermediate expression levels [27]. Whether the novel sequence context presented by the PVL carrying phage enables this high expression, remains to be seen. However, the expression of PVL toxin itself has been attributed to two factors: the phage life cycle and the host background [31]. Whether any of these effects, at least those operating at the transcriptional level, are carried over to *sea* in the PVL phage remains an open question.

Our PVL and RNAIII expression data illustrate that their expression levels are different among the three ST772 isolates. This may apply to toxins carried on the core genome as well, as shown by the expression of  $\alpha$ -hemolysin levels of the three ST772 isolates (Figure S7). The clinical background of each isolate is different and it is conceivable that amount of PVL and SEA produced are influenced by host as well as bacterial factors like bacterial load, tissue specificity, nature of infection, antibiotics used for therapy, co-morbidities and immune status of the patient [32]. However, it remains to be seen whether and how these factors might have ingrained a gene expression pattern that would also be reflected in *in-vitro* growth conditions as observed here.

Importantly, functional analyses of wild type strains carrying the phage versus strains cured of the phage revealed marked differences in important virulence properties. The wild type strains triggered higher superantigenic responses and were significantly more cytotoxic to neutrophils than the cured strains lacking the prophage. These findings thus demonstrate a potentially important biological role for the  $\phi$ IND772PVL prophage in virulence of *S. aureus* ST772, as it produces high levels of SEA and PVL and thereby, enhanced superantigenic and cytotoxic responses, respectively.

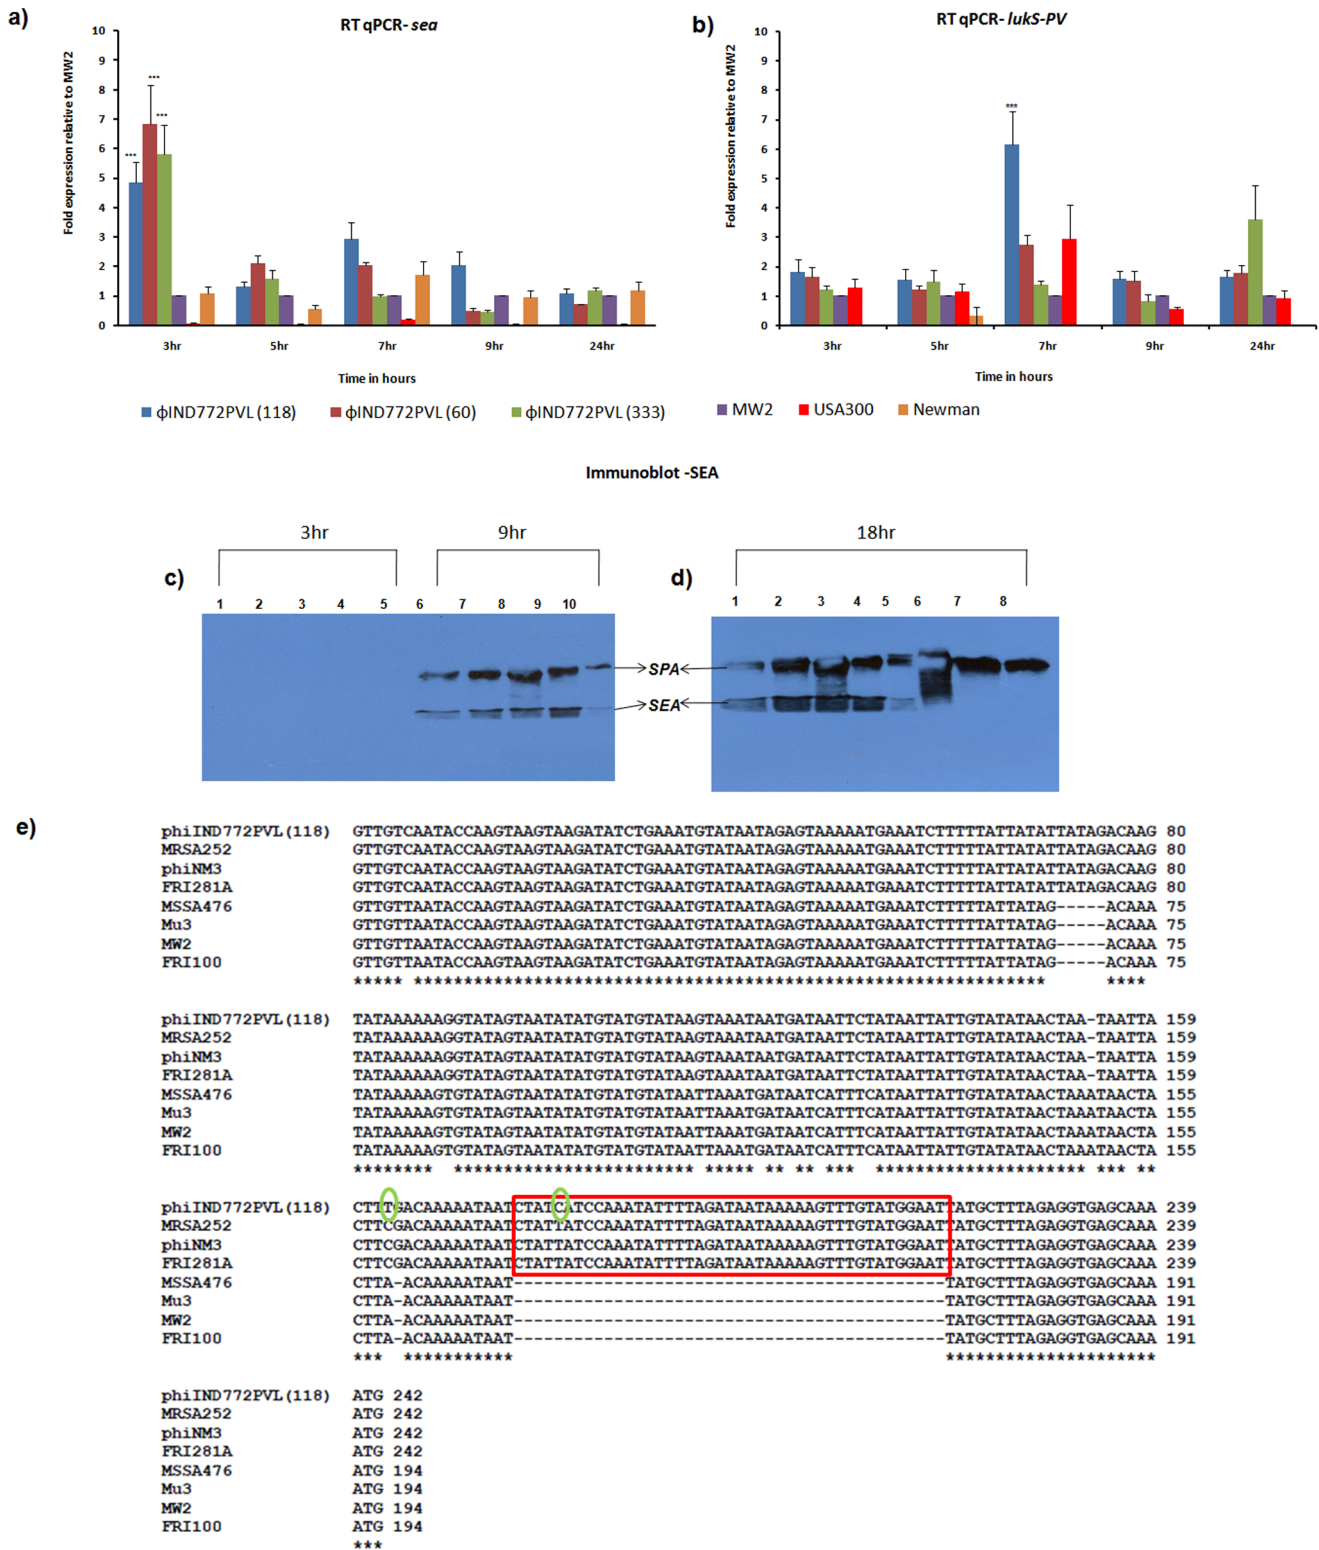

**Figure 3. Comparison of expression patterns of *sea* and *lukS-PV* in ST772 and other *S. aureus* isolates.** (a) Comparison of transcript levels of *sea* in ST772 (60, 118 and 333), Newman, USA300 and MW2 strains by qPCR. Statistical significant differences were determined by ANOVA and Bonferroni's Multiple Comparison Test. φIND772PVL (118), φIND772PVL (60), φIND772PVL (333), significantly expresses higher amounts of *sea* at 3 hr than the control strain MW2 and Newman  $p < 0.0001$ . (b) Comparison of transcript levels of *lukS-PV* in ST772 (60, 118, 333), Newman, USA300 and MW2 strains by qPCR. Statistical significant differences were determined by ANOVA and Bonferroni's Multiple Comparison Test. φIND772PVL (118) significantly expresses higher amounts of *lukS-PV* at 7 hr than the control strain MW2 and USA300  $p < 0.0001$ . Color coding for Figure 4 (a) and (b): φIND772PVL (118): blue; φIND772PVL (60): dark red; φIND772PVL (333): olive green; MW2: purple; Newman: orange; USA300: red. (c) Immunoblot of SEA (3 hr and 9 hr). Lanes 1–5 3hr: 118, 60, 333, MW2 and Newman respectively, 6–10 9hr: 118, 60, 333, MW2 and Newman respectively. (d)

Immunoblot of SEA (18 hr). Lanes 1:118, 2:60, 3:333, 4: MW2, 5: Newman, 6: USA300, 7:118Δ φIND772PVL, 8:118Δ φIND772PVL. (e): Multiple sequence alignment of *sea* promoters *sea1* and *sea2* found in representative *Staphylococcus aureus* strains FRI100 (*sea1*) and FRI281A (*sea2*) reveal that φIND772PVL carries the *sea2* type promoter. The *sea2* type promoter shows an insertion of 43 bp as seen from the multiple sequence alignment. Two Base changes in φIND772PVL are highlighted in green. doi:10.1371/journal.pone.0060013.g003

## Materials and Methods

### Ethical Clearance

We have received *S. aureus* isolates from different hospitals in India, and these hospitals have their own ethical boards which give clearance for collection of samples.

Eighty one community associated *S. aureus* isolates from carriers and patients were used in this study which included 57 PVL positive MRSA, and 24 PVL positive MSSA. Molecular characterization of these isolates is described in earlier publications [16,18]. In addition we also used seven standard *S. aureus* strains and phage DNA (Table S3).

### Identification of PVL- encoding Phages

Eight PCRs were performed to determine the genetic relationship between the PVL prophage from ST772 with five other PVL-encoding phages (φ108PVL, φPVL, φ Sa2958, φSa2MW, φSLT), using primers and procedures described by Ma et al and Otter et al with slight modifications; similar experiments were performed for φSa2USA as described in Boakes et al [8,21,33]. PCRs were also carried out to identify similarities between ST772 PVL phages and φ7247PVL - a newly reported PVL phage from ST59 - by designing primers from its sequence (Table S4). Integrases present in the isolates were determined by a series of PCRs as published earlier [34].

### Induction of Prophages from *S. aureus* and Phage Curing

Overnight grown culture of *S. aureus* (lysogen of PVL phage) was inoculated in 3 ml of BHIB (1:100 dilution) and grown at 37°C to an absorbance of 0.8 at 595 nm and induced with 1 μg/ml of mitomycin C and incubated at 30°C for 3 hr. After centrifugation at 7,000 rpm for 10 minutes, the cell supernatant was sterile filtered and used for infecting RN4220. Overnight grown RN4220 cell pellets were suspended in resuspension buffer (RB) containing 5 mM CaCl<sub>2</sub>, 50 mM Tris pH 7.6 and 0.15 M NaCl. A portion of the serially diluted filtrate was mixed with equal volume of RN4220 and incubated at room temperature for 20 minutes. To this 8 ml of TSB containing 5 mM CaCl<sub>2</sub> and 0.6% agar was added, mixed and overlaid on TSB agar plate containing 5 mM CaCl<sub>2</sub>. Plates were incubated at 30°C overnight to form plaques and single plaque was propagated on RN4220.

For phage curing, mitomycin C induced cell pellet was washed twice and serially diluted with RB, an aliquot of which was mixed with 8 ml of TSB containing 5 mM CaCl<sub>2</sub> and 0.6% agar, and overlaid on a TSB agar plate containing 5 mM CaCl<sub>2</sub> and incubated at 30°C overnight. Colonies were screened by PCR to verify the absence of *luk-SF PV*, *sea*, *int*, *cap* and *por* genes in the cured strain.

### Purification of PVL Bacteriophage and DNA Extraction

The bacteriophage particles were precipitated using Poly Ethylene Glycol (PEG) and NaCl, purified by centrifugation

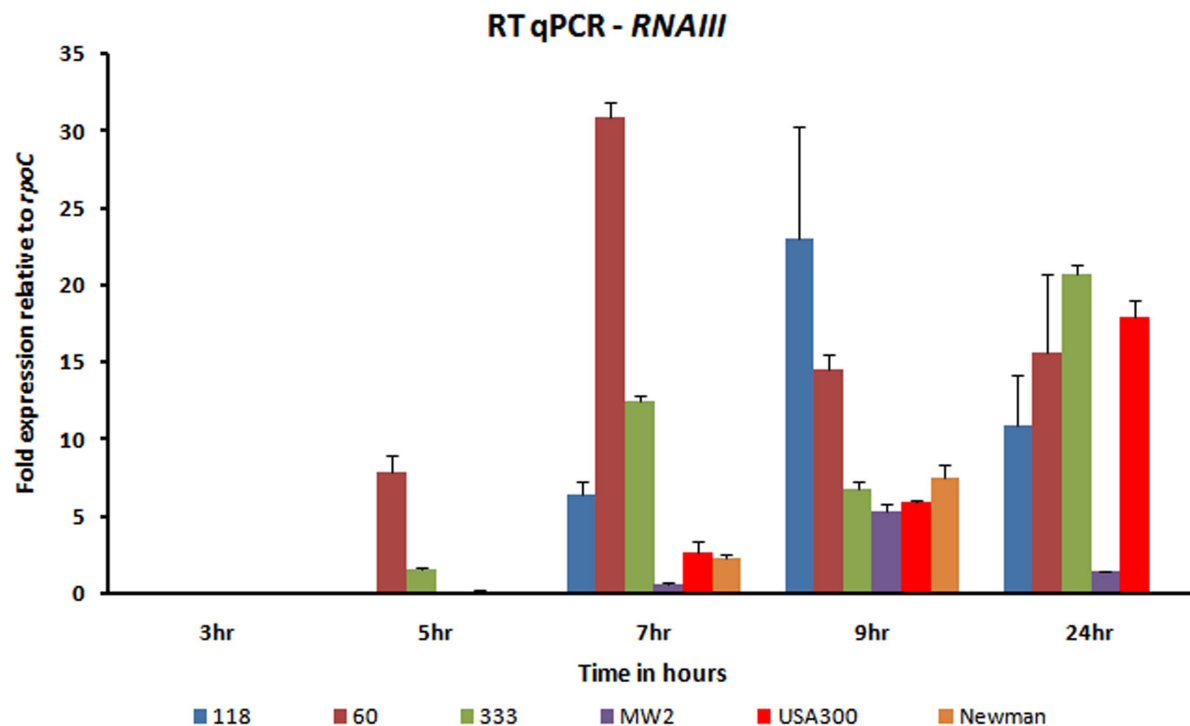

**Figure 4. Comparison of transcript levels of *RNAIII* in ST772 (60, 118, 333), Newman, USA300 and MW2 strains by qPCR.** Color coding: φIND772PVL (118): blue; φIND772PVL (60): dark red; φIND772PVL (333): olive green; MW2: purple; Newman: orange; USA300: red. doi:10.1371/journal.pone.0060013.g004



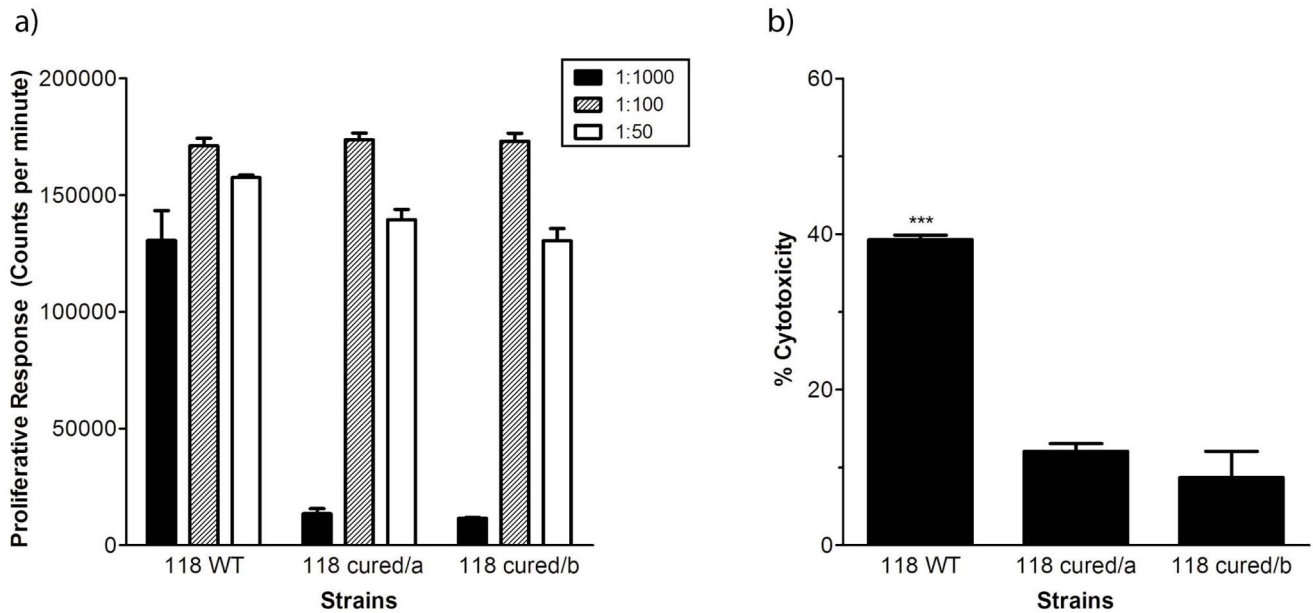

**Figure 5. Functional analyses of wild type and phage cured ST772 (118).** a) Proliferation assay using human peripheral blood mononuclear cells stimulated with different dilutions of supernatants prepared from overnight cultures of 118 wild type strains and two 118 strains cured of  $\phi$ IND772PVL. Proliferative responses were determined by  $^3$ H-thymidine uptake and are presented as mean counts per minute  $\pm$  SD. The figure shows one representative out of two experiments performed using cells from different donors. b) Cytotoxic activity of 118 wild type strain and two strains cured of  $\phi$ IND772PVL. Primary human neutrophils were exposed to bacterial supernatants for 2 hr after which the cell culture media were analyzed for LDH as detailed in material and methods. The data shows mean  $\pm$  SD from two replicates using cells from three different donors. Statistical significant differences were determined by ANOVA and the Tukey HSD post hoc test. Wild type were significantly more cytotoxic than the two cured strains  $p < 0.0001$ .

doi:10.1371/journal.pone.0060013.g005

through glycerol step gradient method and DNA was extracted using Proteinase K and SDS as mentioned in Sambrook et al [35].

### Sequencing of ST772 Isolates

We obtained genomic DNA from five *S. aureus* isolates belonging to ST772, fragmented it to 300 to 400 bp, and sequenced these fragments (75-mer paired-end reads) on an Illumina HiSeq 1000 sequencer using the manufacturer's recommended protocols as described before [25]. PVL phage sequences were derived from the whole genome sequence.

### Sequence Analysis

We obtained draft genomic DNA sequences for five ST772 *S. aureus* isolates (60, 118, 333, 120, 3989) along with reference strain *S. aureus* USA300. The raw-reads for each of the five isolates were filtered for quality and more than  $\sim 8$  million reads were obtained with at-least 100X coverage for the 2.8 Mb *S. aureus* genome. The obtained raw reads were assembled using Velvet 1.2.03 [36]; the results of the de novo whole genome assembly are described in Table S1. The sequences have been deposited in Genbank and following are the accession numbers for *S. aureus* isolates 118: AJGE00000000, 120: ALWE00000000, 333: ALWF00000000, 60: ALWG00000000, 3989: ALWH00000000. The  $\phi$ IND772PVL phage was identified from the contigs using PVL insertion sites (Proximal end sequence HQ020554, Distal end sequence HQ020531). The  $\sim 42$  kb  $\phi$ IND772PVL phage was found in a single contig and was extracted using a PERL script. DNA sequence of all *S. aureus* associated PVL and non-PVL phages were obtained from NCBI nucleotide ENA database [www.ncbi.nlm.nih.gov/genome/phage.html](http://www.ncbi.nlm.nih.gov/genome/phage.html) [37], prophage database <http://ispc.weizmann.ac.il/prophagedb> and ACLAME <http://aclame.org>

[38]. ORF prediction was done for all the phages using GLIMMER 3.02 [39]. The phage gene sequences were obtained based on Glimmer ORF predictions. The phage protein sequences were derived from the above gene sequences using EMBOSS transeq [40]. A Bi-directional Best Hit (BBH) pfinder was performed with an e-value threshold of  $10^{-20}$  to define orthologs (hmmer.org version 3.0). Needleman-Wunsch global alignment algorithm was used to determine sequence similarity between the orthologs. The matrix of ortholog occurrences thus obtained was used to cluster the phage sequences, based on Euclidean distances. The hierarchical clustering was performed using Cluster 3.0 [41] and the clusters visualized using TreeView 1.1.6 [42] and the matrix2png web server.

### Verification of the Presence of *sea* in the ST772 PVL Phage

Primers were designed to check the linkage between the enterotoxin A (*sea*) and the *lukF-PV* genes using the 118 (ST772) genome sequence (Gen Bank accession number- AJGE00000000). The following set of primers were used: *entA-F* (5'GGTTATCAATGTGCGGGTGG 3'); *PVL-R* (5'AACTATCTCTGCCATATGGT 3').

### Transmission Electron Microscopy

Phage suspension was loaded on 200 mesh formvar carbon coated copper grid (Tedpella Inc) and allowed the cells to adsorb on the grid for 4 minutes, excess liquid was removed by blotting. The sample was stained with 2% Uranyl acetate for 30 seconds and imaged under Transmission Electron Microscope [43] (Tecnaï, T12 G2 Biotwin, FEI Co.,) with 120 KeV objective

aperture. Images were acquired using 4K×2K Gatan Orius CCD camera.

### Real-time Quantitative PCR

Overnight grown *S. aureus* cultures (60, 118, 333, Newman, USA 300 and MW2) were re-inoculated in TSB (1:1000) and grown at 37°C under shaking (200 rpm). The samples were collected every hour to record the OD at 595 nm to generate a growth curve from which 3, 5, 7, 9 and 24 hr were chosen for RNA extraction. The bacterial cultures were concentrated or diluted to 1 OD and 400 µl of the cultures were taken for total RNA extraction using the Rneasy Mini kit (Qiagen) according to the manufacturer's instructions. One microgram of each RNA was reverse transcribed using Quantitect Reverse transcription kit (Qiagen). cDNA (20 ng) from each isolate was used for real-time quantitative PCR using the Eco Real Time PCR system (Illumina). *sea*, *lukS-PV* and *RNAlIII* genes were amplified using primers listed in (Table S4) and *rpoC* gene was amplified as an endogenous control. Five sets of experiments were performed and all the reactions were performed in triplicates. The relative transcriptional levels within distinct experiments were determined by using the  $2^{-\Delta\Delta CT}$  method [44].

### SDS-PAGE and SEA Western Blots

Culture supernatants from 3, 9 and 18 hr grown cultures were concentrated using Amicon Ultra (Millipore, Ireland). Equal amount of protein from each isolate was resolved on 12% acrylamide gels and transferred to nitrocellulose membrane using semidry transfer technique. Membrane was blocked using 5% skim milk powder and 5 mM DEPC in PBS pH 6.0 for 20 minutes at room temperature, washed thrice with PBS pH 7.4 containing 0.1% tween 20 (PBST), followed by overnight incubation at 4°C with 1:10,000 dilution of rabbit anti SEA antibody (Sigma Aldrich, India) in PBS containing 0.05% tween 20 [45]. Membranes were washed thrice with PBST followed by incubation with 1:20,000 dilution of Anti rabbit IgG-HRP conjugate (Sigma Aldrich) in PBS containing 0.05% tween 20. Membranes were washed thrice with PBST and developed using Rapid Step ECL Reagent (Calbiochem, USA) and the fluorescence was captured on an X-ray film.

### PBMC Proliferation Assay

Human peripheral blood mononuclear cells (PBMC) were isolated using Lymphoprep (Axis-Shield) density centrifugation. Cells were seeded at  $2 \times 10^5$  cells/well in 200 µl of RPMI supplemented with 10% FCS, 10 µM of L-glutamine (Thermo Scientific HyClone) and 5X Penicillin/Streptomycin (Thermo Scientific HyClone) in a 96 well plate. The cells were stimulated with different dilutions of bacterial supernatants prepared from overnight cultures of bacterial isolates and incubated at 37°C for 72 hr. After 72 hr the cells were pulsed with 1 µCi of 3H-thymidine (Perkin-Elmer) per well and incubated at 37°C for 6 hr. Ability to induce proliferation of PBMC was assessed as 3H-thymidine uptake measured in beta-scintillation counter [46].

### Cytotoxic Activity Against Neutrophils

Human neutrophils were isolated from fresh peripheral blood from healthy individuals using Polymorphprep (Axis-Shield PoC AS, Norway) density centrifugation. The remaining pellet was resuspended in complete RPMI containing 5% FCS, 2 mM L-glutamine, 100 U/ml penicillin, 100 g/ml streptomycin, 1 M Hepes (all from Invitrogen), counted and resuspended at a

concentration of  $1 \times 10^6$  cells/ml. Neutrophils were seeded at  $5 \times 10^5$  cells/well in 1 ml of complete RPMI in a 24 well plate. The neutrophils were stimulated for 2 hr with bacterial supernatant diluted 1:50. Lactate dehydrogenase (LDH) leakage to the culture medium of neutrophils was measured with a CytoTox 96 nonradioactive cytotoxicity assay kit (Promega, Madison, WI) according to the manufacturer's protocol. Maximum LDH release was determined by lysing the cells with lysis solution for 45 minutes. The absorbance was read at 490 nm using a Microplate Manager 6 reader (Bio-Rad, Hemel Hempstead, U.K.).

### Supporting Information

**Figure S1** Agarose gel picture for PCRs to identify  $\phi 7247$ PVL. (PDF)

**Figure S2** Box-plot representation of estimated insert size distribution. (PDF)

**Figure S3** Dot plot analysis. (PDF)

**Figure S4** Representation of sequence similarity (Needleman-Wunsch alignment) between  $\phi$ IND772PVL (from strain 118) phage and  $\phi$ NM3,  $\phi$ IND772PVL (from strain 333),  $\phi$ SLT,  $\phi$ 108PVL,  $\phi 7247$ PVL and  $\phi$ MRSA252. (PDF)

**Figure S5** Agarose gel picture of sea-lukF-PV linkage PCR. (PDF)

**Figure S6** Growth curve. (PDF)

**Figure S7** Transcript levels of hla in ST772 isolates. (PDF)

**Table S1** Summary table of de novo genome assembly. (PDF)

**Table S2** Annotation of the PVL phage from *S. aureus* ST772 (isolate 118). (PDF)

**Table S3** Strains used in the study. (PDF)

**Table S4** List of primers used in the study. Additional data are available at [http://www.bugbears.in/staph\\_772\\_pvl](http://www.bugbears.in/staph_772_pvl). (PDF)

### Acknowledgments

We thank all the clinicians who shared their clinical isolates. Genomic DNA sequencing was performed by the Next-Generation Genomics Laboratory facility at the Centre for Cellular and Molecular Platforms, and electron microscopy by the TEM facility, CIFF at NCBS, Bangalore. We would like to thank Bhavya Chakrakodi, Jayanth Balakumtla (SID), Malali Gowda (C-CAMP) and Bhavyashree Suresh (NCBS) for technical help. We are indebted to Michele Bes and Jerome Etienne (University of Lyon, France) for providing us with strains Newman, USA300 and MW2.

### Author Contributions

Conceived and designed the experiments: GA ASNS ANT. Performed the experiments: SP SK SMS RS AB. Analyzed the data: SP SK SMS RS. Contributed reagents/materials/analysis tools: GA ASNS ANT SP SK SMS RS AB. Wrote the paper: GA ASNS ANT.

## References

- Chambers HF, De Leo FR (2009) Waves of resistance: *Staphylococcus aureus* in the antibiotic era. *Nature Rev. Microbiol.* 7: 629–641.
- Chambers HF (2005) Community-Associated MRSA- Resistance and Virulence Converge. *New England J Med.* 352: 1485–1487.
- Feng Y, Chen C, Su L, Hu S, Yu J, et al. (2008) Evolution and pathogenesis of *Staphylococcus aureus*: lessons learned from genotyping and comparative genomics. *FEMS Microbiol Rev.* 32: 23–37.
- Malachowa N, DeLeo FR (2010) Mobile genetic elements of *Staphylococcus aureus*. *Cellular and Molecular life Sciences* 67: 3057–3071.
- Vandenesch F, Naimi T, Enright MC, Lina G, Nimmo GR, et al. (2003) Community Acquired- Methicillin Resistant *Staphylococcus aureus* carrying PVL genes. *Emerg Infect Dis* 9: 978–984.
- Narita S, Kaneko J, Chiba J, Piemont Y, Jarraud S, et al. (2001) Phage conversion of Pantone- Valentine Leukocidin in *Staphylococcus aureus*: molecular analysis of a PVL- converting phage,  $\phi$ SLT. *Gene* 268: 195–206.
- Ma XX, Ito T, Chongtrakool P, Hiramatsu K (2006) Predominance of clones carrying Pantone- Valentine Leukocidin genes among Methicillin- Resistant *Staphylococcus aureus* strains isolated in Japanese hospitals from 1979 to 1985. *Journal of Clin Microbiol* 44: 4515–4527.
- Ma XX, Ito T, Kondo Y, Cho M, Yoshizawa Y, et al. (2008) Two different Pantone- Valentine Leukocidin phage lineages predominate in Japan. *J. Clin. Microbiol* 46: 3246–3258.
- Zhang M, Ito T, Li S, Jin J, Takeuchi F, et al. (2011) Identification of the third type of PVL phage in ST59 methicillin-resistant *Staphylococcus aureus* (MRSA) strains. *FEMS Microbiol Lett* 323: 20–28.
- Diep BA, Palazzolo-Balance AM, Tattevin P, Basuino L, Braughton KR, et al. (2008) Contribution of Pantone-Valentine Leukocidin in community-associated methicillin-resistant *Staphylococcus aureus* pathogenesis. *PLoS ONE* 3: e3198.
- Tong A, Tong SYC, Zhang Y, Lamlerthson S, Sharma-Kuinkel BK, et al. (2012) Pantone-Valentine Leukocidin Is Not the Primary Determinant of Outcome for *Staphylococcus aureus* Skin Infections: Evaluation from the CANVAS Studies. *PLoS ONE* 7: e37212.
- Yoong P, Pier GB (2012) Immune-activating properties of Pantone-Valentine Leukocidin (PVL) improves the outcome in a model of methicillin-resistant *Staphylococcus aureus* (MRSA) pneumonia. *Infect. Immun* 80: 2894–2904.
- Graves SF, Kobayashi SD, Braughton KR, Whitney AR, Sturdevant DE, et al. (2012) Sublytic concentrations of *Staphylococcus aureus* Pantone-Valentine leukocidin alter human PMN gene expression and enhance bactericidal capacity. *Journal of Leukocyte Biology* 92: 362–374.
- Perret M, Badiou C, Lina G, Burbaud S, Benito Y, et al. (2012) Cross-talk between *S. aureus* leukocidins-intoxicated macrophages and lung epithelial cells triggers chemokines secretion in an inflammasome-dependent manner. *Cellular Microbiology* 14: 1019–1036.
- Tattevin P, Schwartz BS, Graber CS, Volinski J, Bhukhen A, et al. (2012) Concurrent Epidemics of Skin and Soft Tissue Infection and Bloodstream Infection due to Community-associated *Methicillin-Resistant Staphylococcus aureus*. *Clin. Inf. Dis* 55: 781–8.
- Shambat SM, Nadig S, Prabhakara S, Bes M, Etienne J, et al. (2012) Clonal complexes and virulence factors of *Staphylococcus aureus* from several cities in India. *BMC Microbiology* 12: 64.
- D 'Souza N, Rodrigues C, Mehta A (2010) Molecular characterization of methicillin resistant *Staphylococcus aureus* with emergence of epidemic clones of sequence type ST 22 and ST772 in Mumbai, India. *J. Clin. Microbiol* 48: 1806–1811.
- Nadig S, Velusamy N, Lalitha P, Kar S, Sharma S, et al. (2012) *Staphylococcus aureus* eye infections in two Indian hospitals: emergence of ST772 as a major clone. *Clinical Ophthalmology* 6: 165–173.
- Afroz S, Kobayashi N, Nagashima S, Alam MM, Hossain AB, et al. (2008) Genetic characterization of *Staphylococcus aureus* isolates carrying Pantone- Valentine leukocidin genes in Bangladesh. *Jpn. J. Infect Dis.* 61: 393–396.
- Neela V, Ehsanollah GR, Zambari S, Van Belkum A, Mariana NS (2009) Prevalence of Pantone- Valentine leukocidin genes among carriage and invasive *Staphylococcus aureus* isolates in Malaysia. *International Journal of Infectious Diseases* 13: e131–e132.
- Boakes E, Kearns AM, Ganner M, Perry C, Hill RL, et al. (2010) Distinct Bacteriophages Encoding Pantone-Valentine Leukocidin (PVL) among International Methicillin-Resistant *Staphylococcus aureus* Clones Harboring PVL. *J. Clin Microbiol* 49: 684–692.
- Brennan GI, Shore AC, Corcoran S, Tecklenborg S, Coleman DC, et al. (2012) Emergence of hospital- and community-associated Pantone-Valentine leukocidin-positive methicillin-resistant *Staphylococcus aureus* genotype ST772-MRSA-V in Ireland and detailed investigation of a ST772-MRSA-V cluster in a neonatal intensive care unit. *J. Clin. Microbiol* 50: 841–847.
- Yamaguchi T, Nakamura I, Chiba K, Matsumoto T (2012) Epidemiological and Microbiological Analysis of Community-Associated Methicillin-Resistant *Staphylococcus aureus* Strains Isolated from a Japanese Hospital. *Jpn. J. Infect. Dis* 65: 175–178.
- Zanger P, Nurjadi D, Schleucher R, Scherbaum H, Wolz CP, et al. (2012) Import and Spread of Pantone-Valentine Leukocidin-Positive *Staphylococcus aureus* Through Nasal Carriage and Skin Infections in Travelers Returning From the Tropics and Subtropics. *Clin. Infect. Dis* 54: 483–488.
- Prabhakara S, Khedkar S, Loganathan RM, Chandana S, Gowda M, et al. (2012) Genome announcement: Draft genome sequence of *Staphylococcus aureus* 118 (ST772), a major disease clone from India. *J Bacteriol* 194: 3727–8.
- van Wamel WJ, Rooijackers SH, Ruyken M, van Kessel KP, van Strijp JA (2006) The Innate Immune modulators Staphylococcal Complement Inhibitor and Chemotaxis Inhibitory Protein of *Staphylococcus aureus* Are Located on  $\beta$ -Hemolysin-Converting Bacteriophages. *J. Bacteriol* 188: 1310–1315.
- Cao R, Zeaki N, Wallin-Carlquist N, Skandamis PN, Schelin J, et al. (2012) Elevated Enterotoxin A Expression and Formation in *Staphylococcus aureus* and its Association with Prophage Induction. *App. Environ. Microbiol* 78: 4942–3.
- Queck SY, Jameson- Lee M, Villaruz AE, Bach TL, Khan BA, et al. (2008) RNAPII-independent target gene control by the *agr* quorum-sensing system: insight into the evolution of virulence regulation in *Staphylococcus aureus*. *Mol Cell* 32: 150–158.
- Dauwalder O, Thomas D, Ferry T, Debard AL, Badiou C, et al. (2006) Comparative inflammatory properties of staphylococcal superantigenic enterotoxins SEA and SEG: implications for septic shock. *J Leukoc Biol* 80: 753–758.
- Schelin J, Wallin-Carlquist N, Cohn MT, Lindqvist R, Barker GC, et al. (2011) The formation of *Staphylococcus aureus* enterotoxin in food environments and advances in risk assessment. *Virulence* 2: 580–592.
- Wirtz C, Witte W, Wolz C, Goerke C (2009) Transcription of the phage encoded Pantone-Valentine leukocidin of *Staphylococcus aureus* is dependent on the phage life-cycle and on the host background. *Microbiology* 155: 3491–3499.
- Boakes E, Kearns AM, Badiou C, Lina G, Hill RL, et al. (2012) Do Differences in Pantone-Valentine Leukocidin Production among International Methicillin-Resistant *Staphylococcus aureus* Clones Affect Disease Presentation and Severity? *J. Clin. Microbiol.* 50: 1773–1776.
- Otter JA, Kearns AM, French GL, Ellington MJ (2010) Pantone-Valentine leukocidin- encoding bacteriophage and the gene sequence variation in community- associated methicillin- resistant *Staphylococcus aureus*. *Clinical microbiology and infection* 16: 68–73.
- Goerke C, Pantucek R, Holtfreter S, Schulte B, Zink M, et al. (2009) Diversity of prophages in dominant *Staphylococcus aureus* clonal lineages. *J. Bacteriol* 191: 3462–3468.
- Sambrook J, Russell DW (2001) *Molecular cloning: A Laboratory Manual. CSHL Press.* Third edition: volume 1.
- Zerbino DR, Birney E (2008) Velvet: algorithms for de novo short read assembly using de Bruijn graphs. *Genome Res* 18: 821–829.
- Leinonen R (2011) The European Nucleotide Archive. [http://nar.oxfordjournals.org/content/39/suppl\\_1/D28](http://nar.oxfordjournals.org/content/39/suppl_1/D28). doi: 10.1093/nar/gkq967.
- Raphae IL, Aline H, Shoshana JW, Ariane T (2004) ACLAME: A classification of Mobile genetic Elements. *Nucleic Acids Research* 32: 45–49.
- Delcher A, Harmon D, Kasif S, White O, Salzberg S (1999) Improved microbial gene identification with GLIMMER. *Nucl. Acids Res* 27: 4636–4641.
- Rice P, Longden I, Bleasby A (2000) EMBOSS: The European Molecular Biology Open Software Suite. *Trends in Genetics* 16: 276–277.
- Yeung KY, Ruzzo WL (2001) Principal Component Analysis for clustering gene expression data. *Bioinformatics* 17: 763–774.
- Page RDM (1996) TREEVIEW: An application to display phylogenetic trees on personal computers. *Computer Applications in the Biosciences* 12: 357–358.
- Fortier LC, Moineau S (2007) Morphological and Genetic Diversity of Temperate Phages in *Clostridium difficile*. *Appl Environ Microbiol.* 73: 7358–7366.
- Livak KJ, Schmittgen TD (2001) Analysis of relative gene expression data using realtime quantitative PCR and the 2<sup>-</sup>[Delta Delta (CT)] Method. *Methods* 25: 402–408.
- Nguyen HM, Rocha MA, Chintalacheruvu KR, Beenhouwer DO (2010) Detection and quantification of Pantone- Valentine leukocidin in *Staphylococcus aureus* cultures by ELISA and Western blotting: Diethylpyrocarbonate inhibits binding of protein A to IgG. *J. Immunol Methods* 356:1–5.
- Darenberg J, Söderquist B, Normark BH, Norrby-Teglund A (2004) Differences in potency of intravenous polyspecific immunoglobulin G against streptococcal and staphylococcal superantigens: implications for therapy of toxic shock syndrome. *Clin Infect Dis* 38: 836–42.
