# Supplementary material for: Genome Sequencing Unveils a Novel Sea Enterotoxin-Carrying PVL Phage in Staphylococcus aureus ST772 from India
Source: PLOS journal article supplement (doi:10.1371/journal.pone.0060013), 2013-03-27

**Figure S3: Box-plot representation of estimated insert size distribution**

Raw reads for each *Staphylococcus aureus* (Sa) isolate were mapped back to the respective contigs using bwa 0.6.2 to determine insert size distribution.

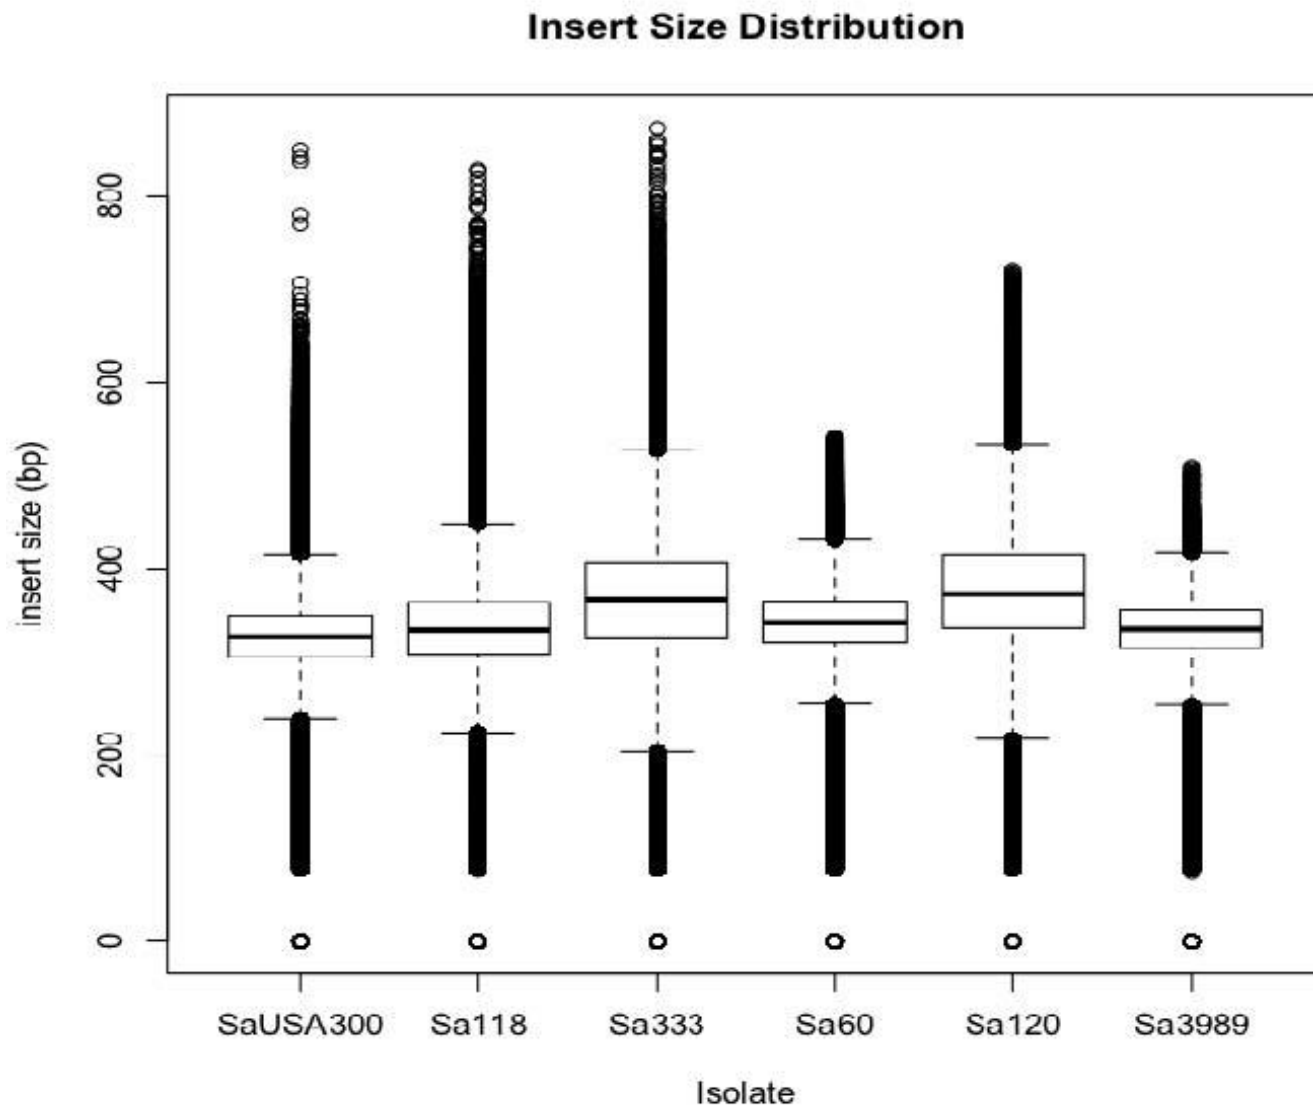

Supplement: S2 (10.1371/journal.pone.0060013.s002) [file journal.pone.0060013.s002]
