# Supplementary material for: Genome Sequencing Unveils a Novel Sea Enterotoxin-Carrying PVL Phage in Staphylococcus aureus ST772 from India
Source: PLOS journal article supplement (doi:10.1371/journal.pone.0060013), 2013-03-27

### Figure S6: Dot plot analysis

118PVL phage was compared with *Staphylococcus aureus* PVL and non-PVL phages using EMBOSS dotmatcher with window size of 230 and threshold of 100 and following dot plots were generated

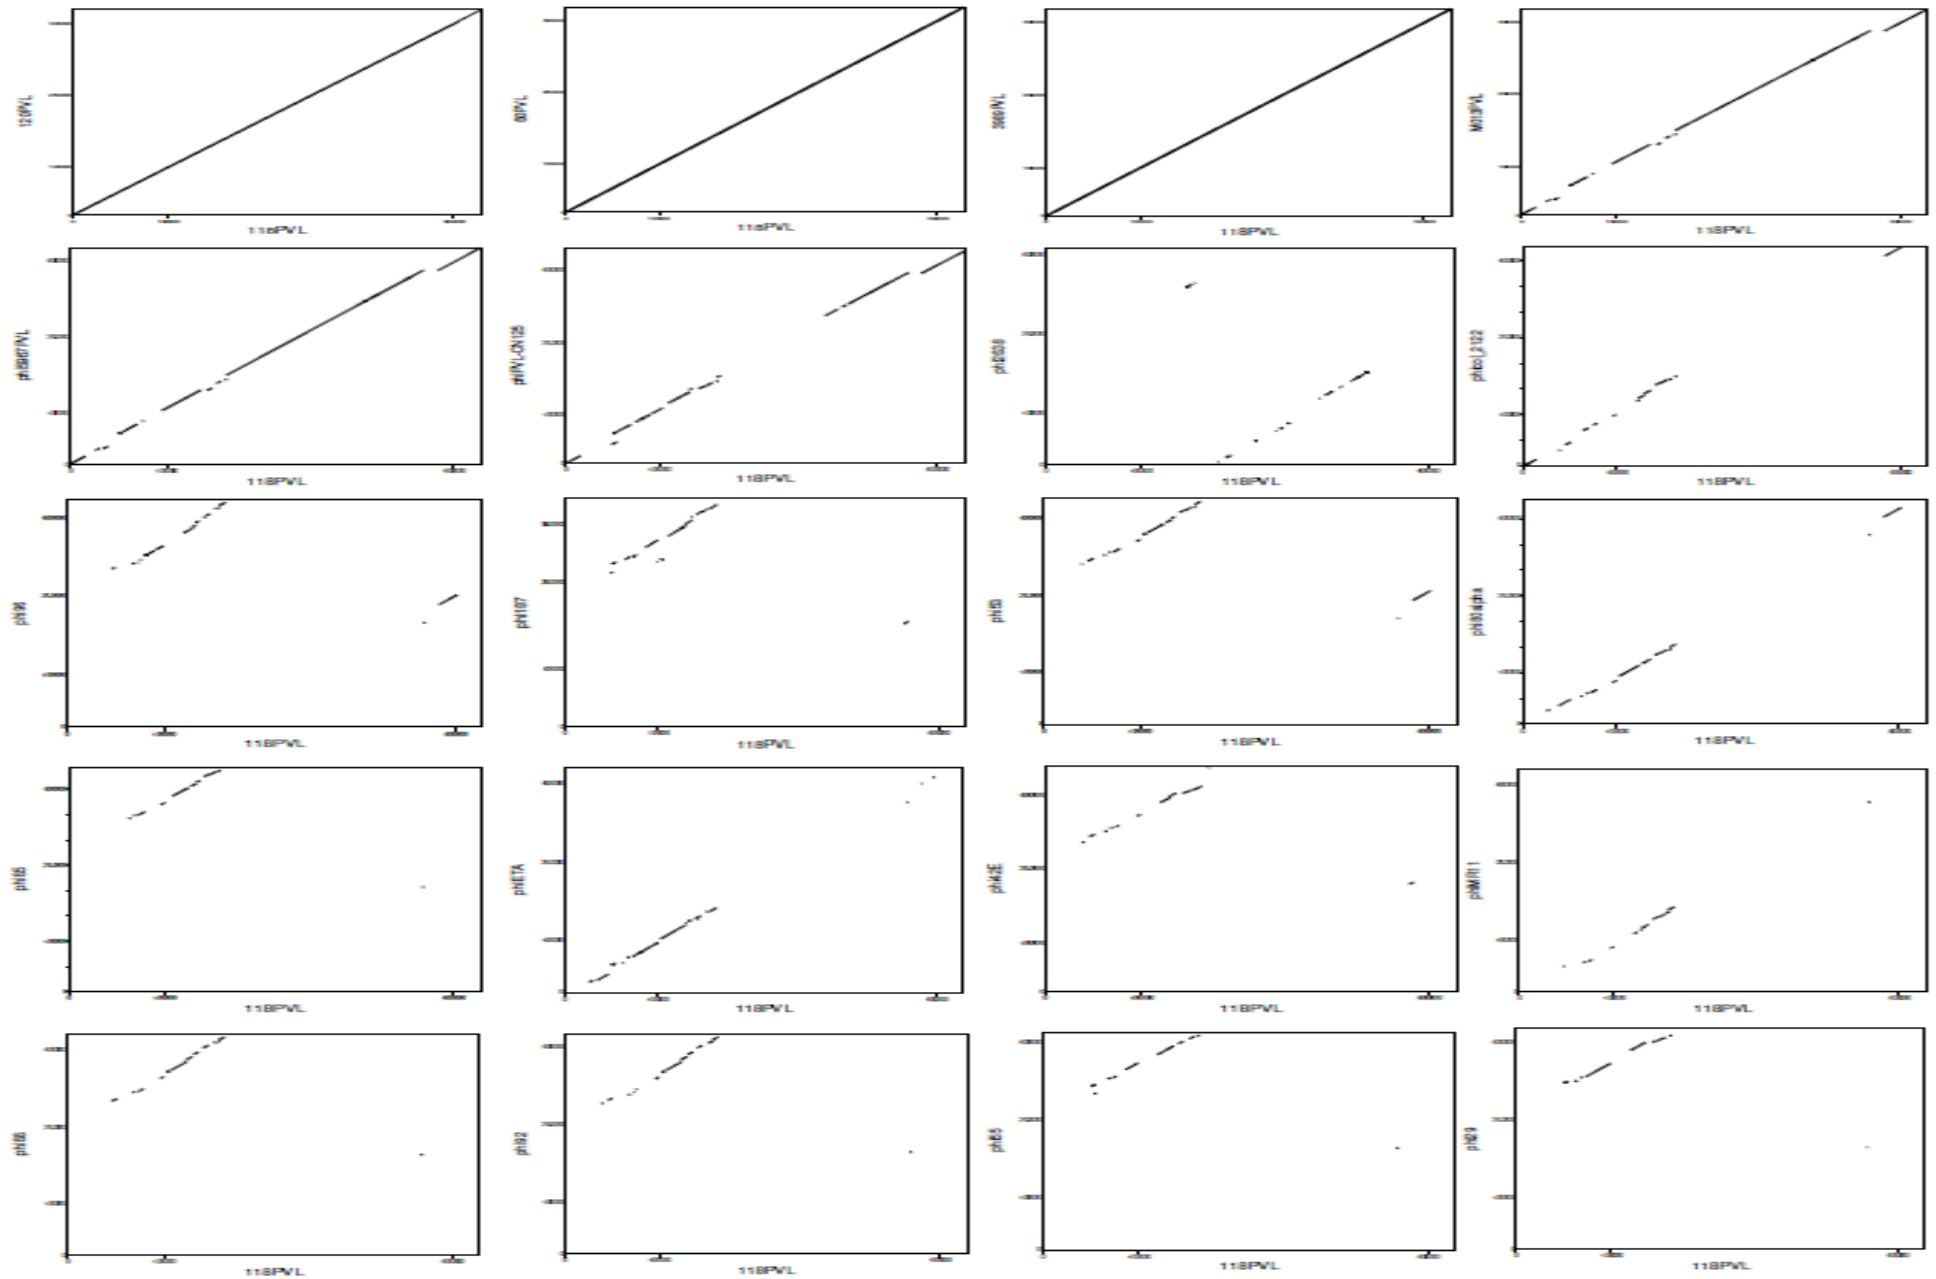

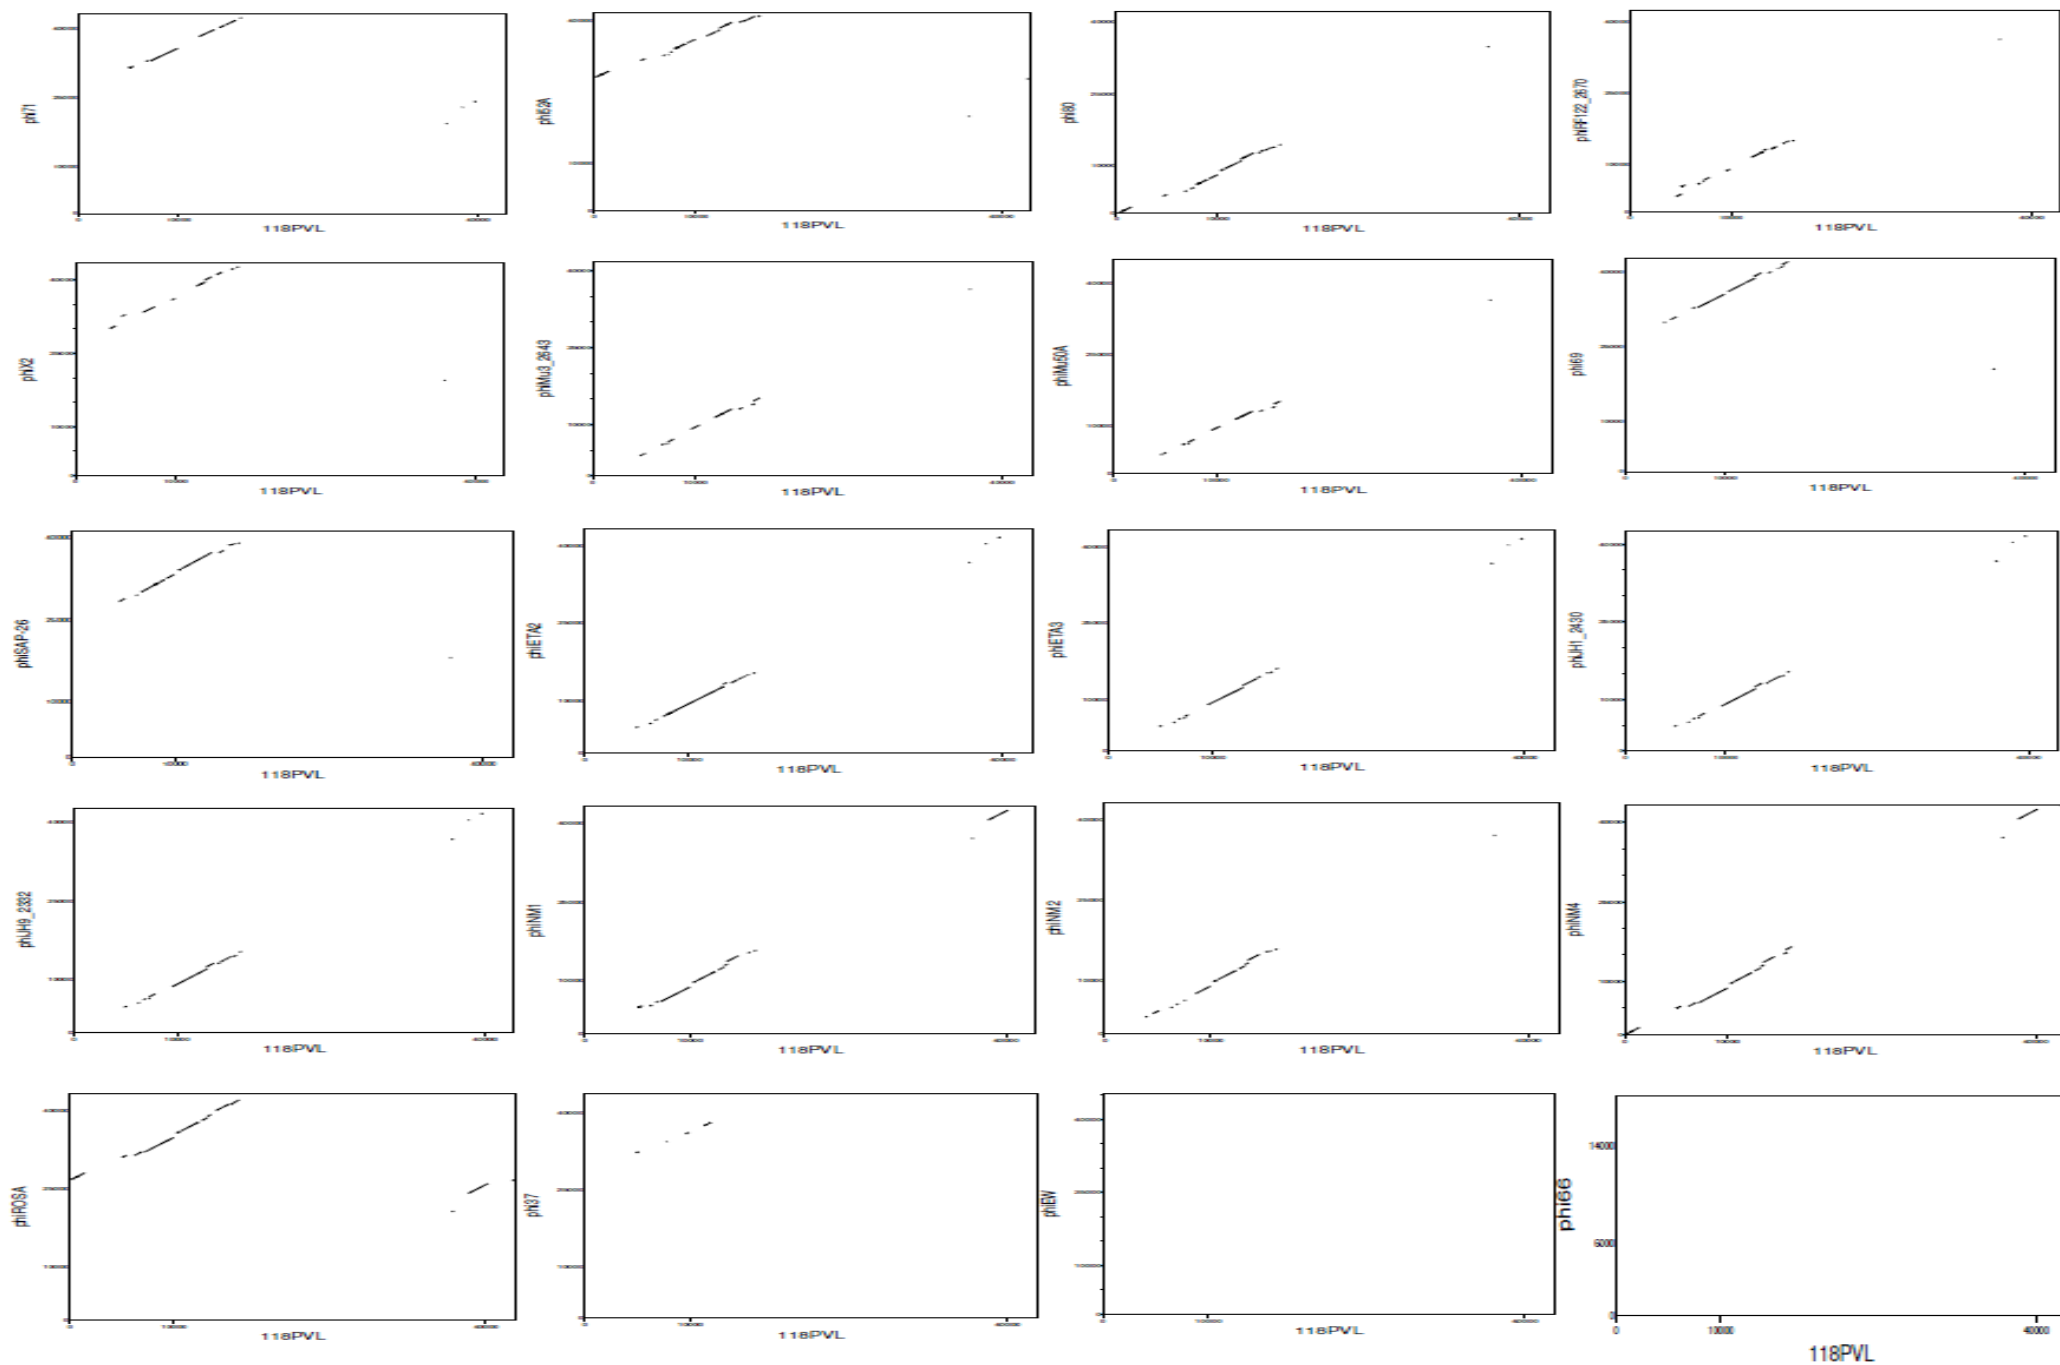

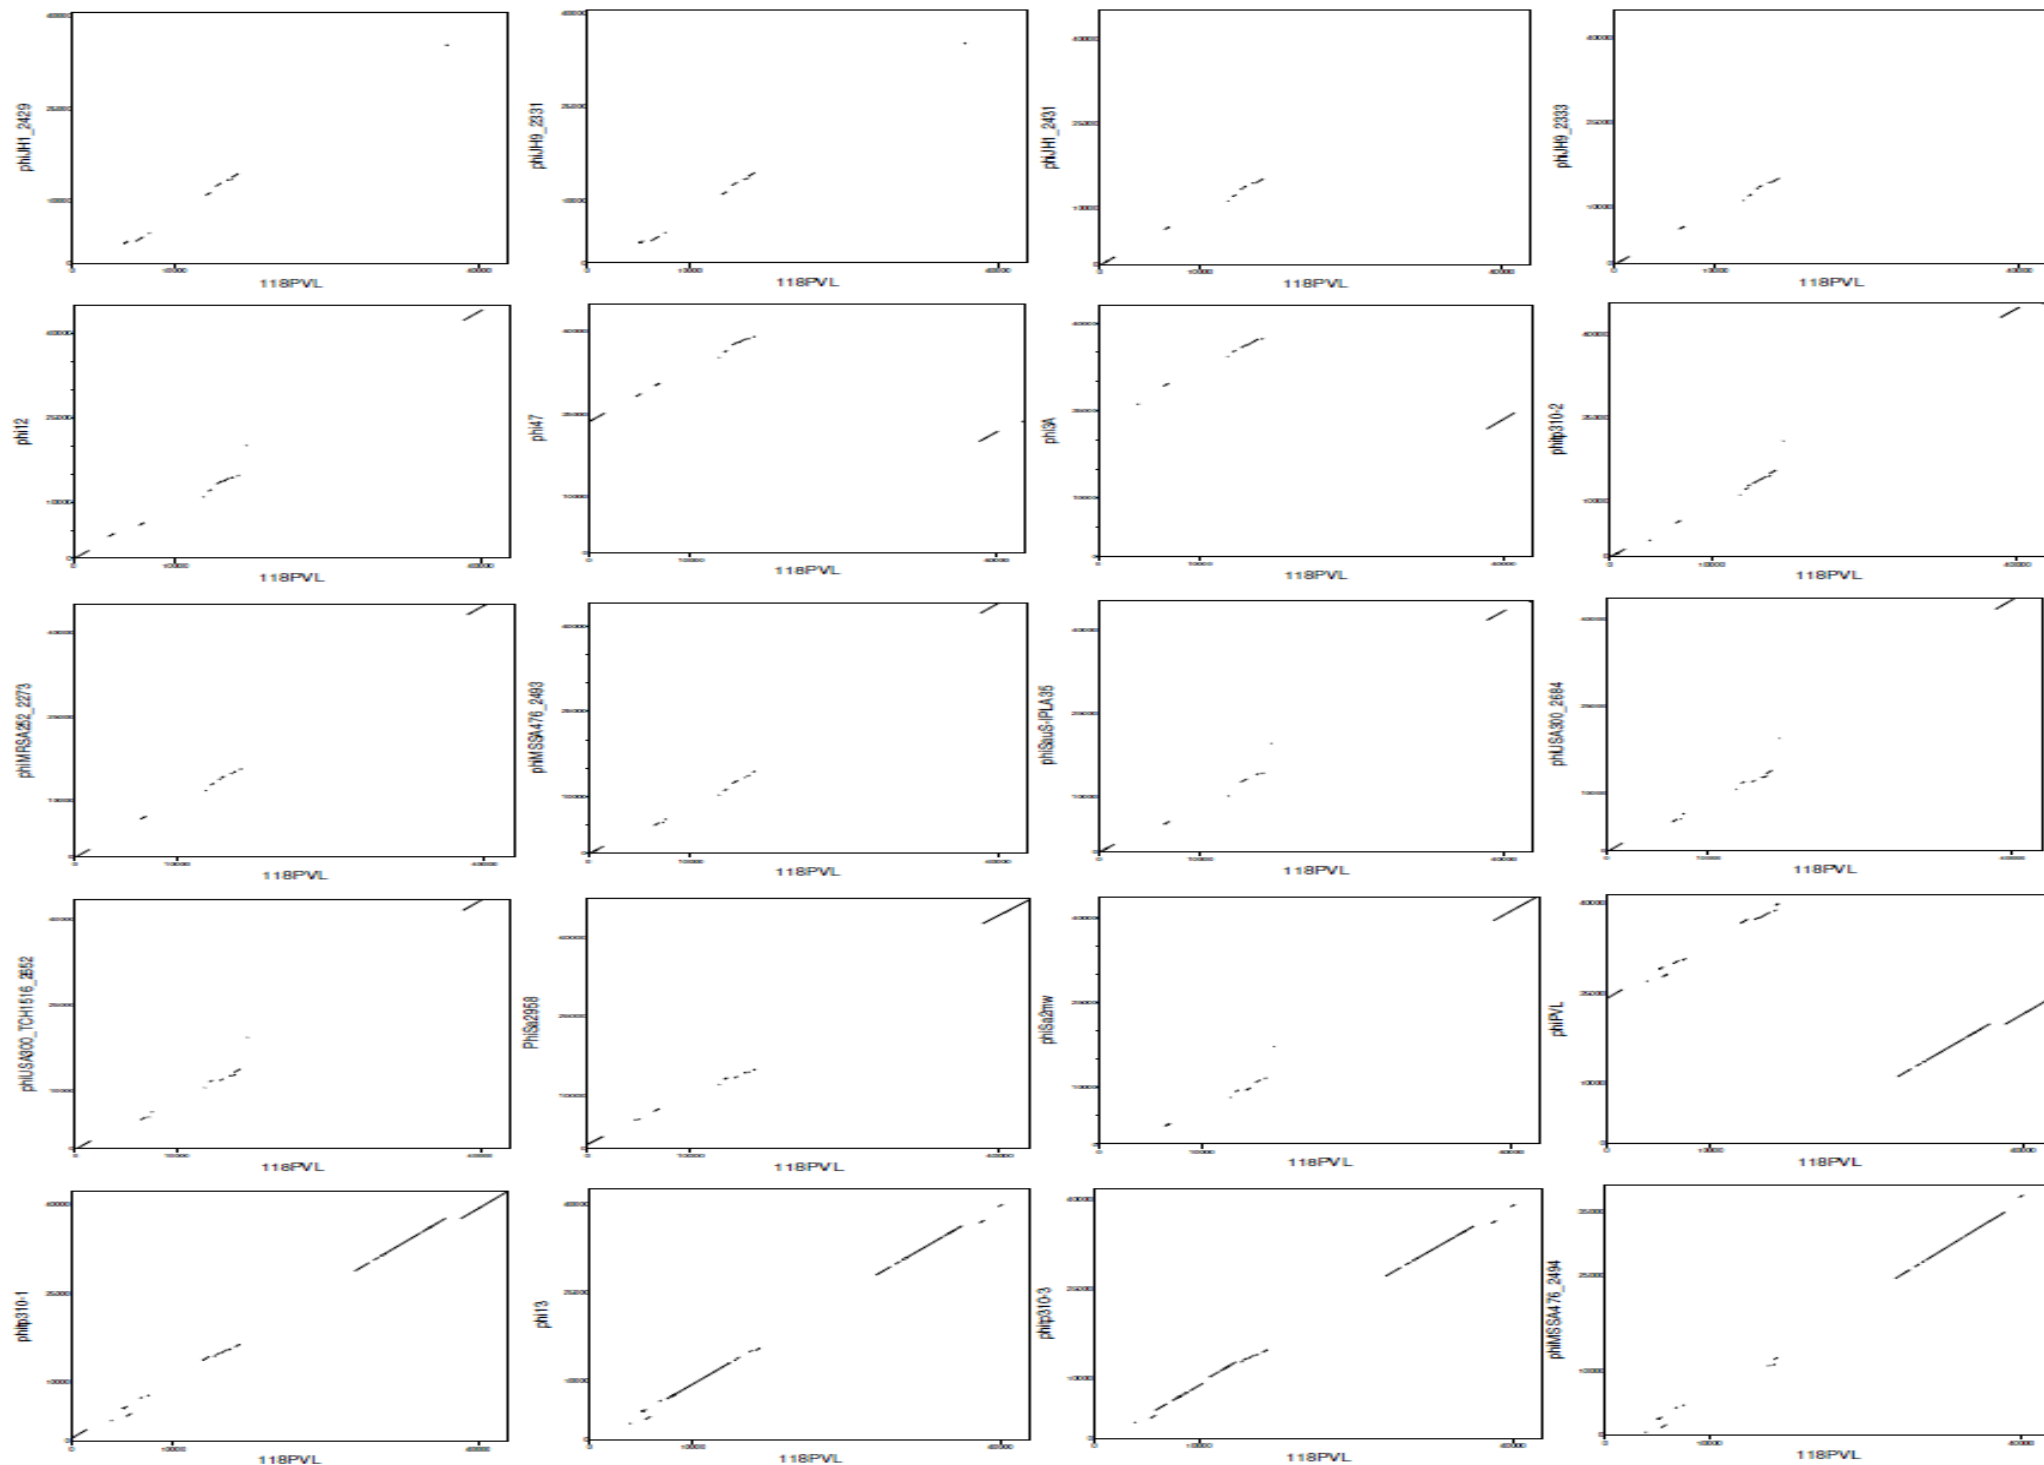

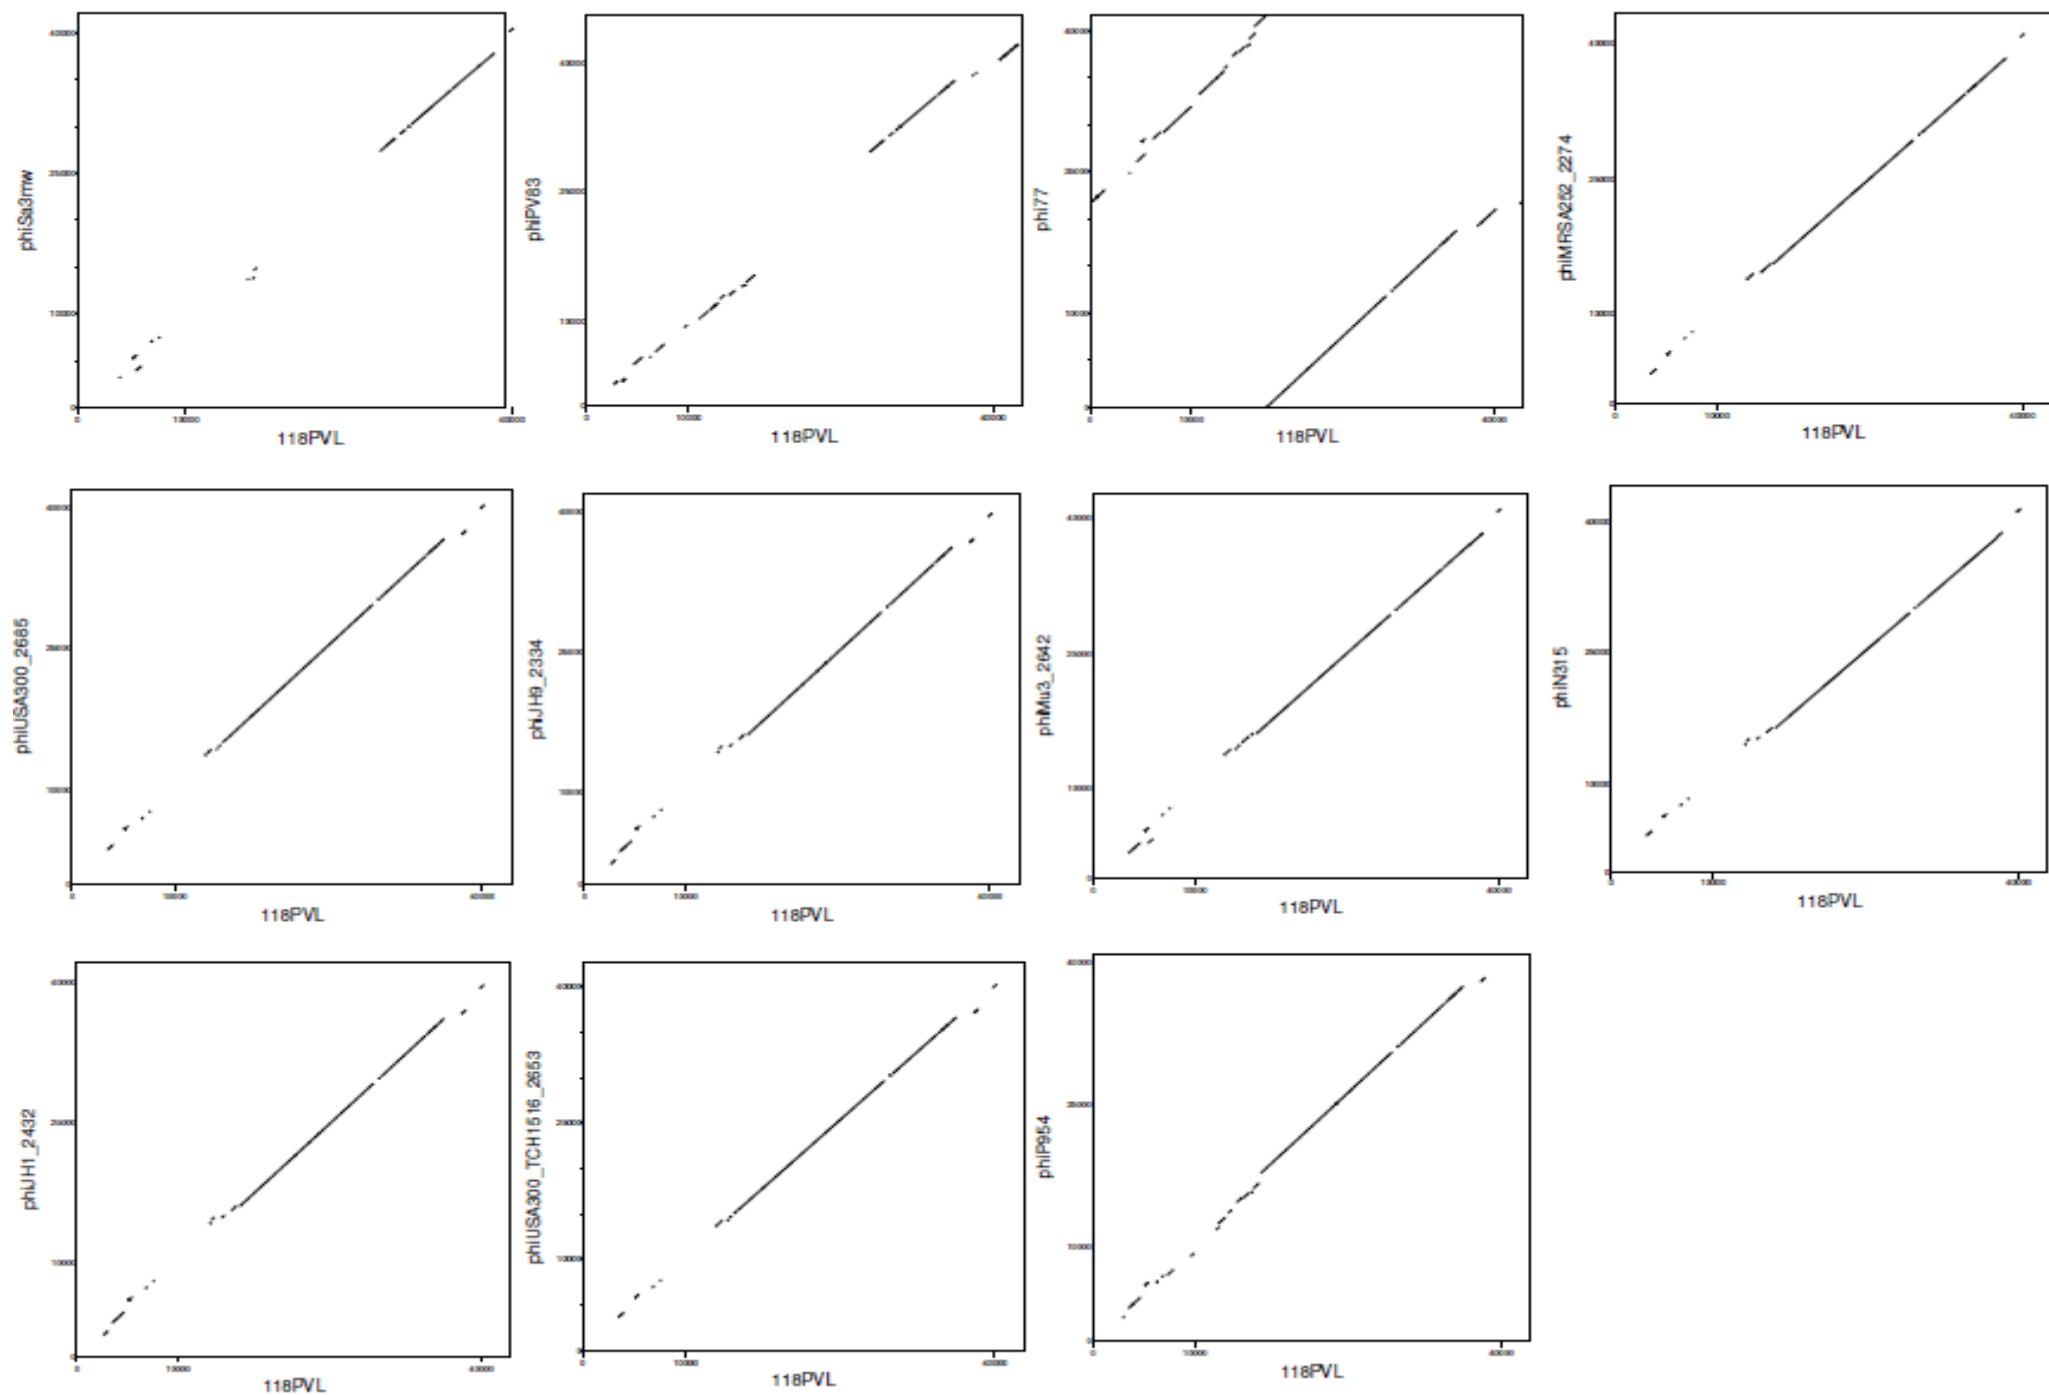

Supplement: S4 (10.1371/journal.pone.0060013.s004) [file journal.pone.0060013.s004]
