# Supplementary material for: Genome Sequencing Unveils a Novel Sea Enterotoxin-Carrying PVL Phage in Staphylococcus aureus ST772 from India
Source: PLOS journal article supplement (doi:10.1371/journal.pone.0060013), 2013-03-27
Supplement: S9 (10.1371/journal.pone.0060013.s009) [file journal.pone.0060013.s009]

**Table S4: Annotation of the PVL phage from *S. aureus* ST772 (isolate 118)  $\phi$ IND772PVL att sites**

| Number | att site | Sequence start (bp) | Sequence end (bp) | Percent Similarity by Smith Waterman Algorithm |
|--------|----------|---------------------|-------------------|------------------------------------------------|
| 1      | attB-L   | 75                  | 99                | 96                                             |
| 2      | attP-L   | 129                 | 153               | 92                                             |
| 3      | attB-R   | 42728               | 42752             | 88                                             |
| 4      | attP-R   | 42674               | 42698             | 100                                            |

**$\phi$ IND772PVL ORFs**

| <b>118PVL phage</b> |                   |                 | <b>Homology (% similarity)<sup>a</sup></b> |                          |                      |                      | <b>Homology to others<sup>b</sup></b>                                                                    | <b>Predicted protein function</b> |
|---------------------|-------------------|-----------------|--------------------------------------------|--------------------------|----------------------|----------------------|----------------------------------------------------------------------------------------------------------|-----------------------------------|
| <b>ORF</b>          | <b>Start (bp)</b> | <b>End (bp)</b> | <b><i>phi108PVL</i></b>                    | <b><i>phi7247PVL</i></b> | <b><i>phiSLT</i></b> | <b><i>phiNM3</i></b> | <b>(% Identity)</b>                                                                                      |                                   |
| orf01               | 23                | 169             | 41.2                                       | 53.6                     |                      |                      | 85% identity against a fragment of a protein from <i>Staphylococcus aureus</i> subsp. <i>aureus</i> IS-M | hypothetical protein              |
| orf02               | 1417              | 212             | 99.3                                       | 99.5                     | 99.5                 |                      |                                                                                                          | phage integrase                   |
| orf03               | 2376              | 1495            |                                            |                          |                      |                      | <i>Staphylococcus haemolyticus</i> (90.1)                                                                | hypothetical protein              |

|       |      |      |      |      |      |      |                                                                                   |                                  |
|-------|------|------|------|------|------|------|-----------------------------------------------------------------------------------|----------------------------------|
| orf04 | 2404 | 2607 |      |      |      |      | Staphylococcus<br>haemolyticus (92.16)                                            | hypothetical protein             |
| orf05 | 2850 | 2665 |      | 95.2 |      |      |                                                                                   | hypothetical protein             |
| orf06 | 2992 | 2837 |      | 94.2 |      |      |                                                                                   | hypothetical protein             |
| orf07 | 3466 | 3023 |      |      |      |      | Weak hits (20-40%<br>identity) against<br>poorly-annotated gram<br>positive genes | N/A                              |
| orf08 | 4200 | 3484 | 76.5 | 75.3 |      | 82.1 |                                                                                   | ci-like repressor                |
| orf09 | 4328 | 4606 | 87.1 |      |      |      |                                                                                   | putative cro-like<br>repressor   |
| orf10 | 4622 | 5419 |      | 53.4 |      | 53.4 |                                                                                   | putative<br>antirepressor        |
| orf11 | 5432 | 5692 | 53.4 | 100  |      |      |                                                                                   | transcriptional<br>regulator     |
| orf12 | 5926 | 6252 | 100  | 100  |      |      |                                                                                   | hypothetical protein             |
| orf13 | 6497 | 6760 | 98.9 | 100  | 97.7 |      |                                                                                   | putative DNA-<br>binding protein |
| orf14 | 6772 | 6939 |      |      |      |      |                                                                                   | hypothetical protein             |
| orf15 | 6940 | 7260 |      |      |      |      | Staphylococcus<br>prophage phiPV83<br>proviral DNA (98.75)                        | hypothetical protein             |
| orf16 | 7352 | 7612 | 98.9 | 79.3 | 100  | 66.7 |                                                                                   | hypothetical protein             |
| orf17 | 7622 | 7843 |      |      |      |      | Staphylococcus phage<br>69 (100)                                                  | hypothetical protein             |

|       |       |       |      |      |      |  |                                  |                                                                                 |
|-------|-------|-------|------|------|------|--|----------------------------------|---------------------------------------------------------------------------------|
| orf18 | 7836  | 8624  | 63.2 |      |      |  | Staphylococcus phage<br>69 (100) | virulence-related<br>phage protein                                              |
| orf19 | 8653  | 9204  | 100  |      |      |  |                                  | Single strand DNA<br>binding protein                                            |
| orf20 | 9217  | 9888  | 98.7 | 76.9 | 77.3 |  |                                  | hypothetical protein                                                            |
| orf21 | 9885  | 10034 | 84.4 | 100  | 100  |  |                                  | hypothetical protein                                                            |
| orf22 | 10308 | 10027 | 98.5 | 100  | 100  |  |                                  | hypothetical protein                                                            |
| orf23 | 10374 | 11144 | 84.4 | 100  | 100  |  |                                  | phage replication<br>protein                                                    |
| orf24 | 11154 | 11933 | 98.5 | 99.6 | 99.6 |  |                                  | phage DnaC-like<br>protein                                                      |
| orf25 | 11927 | 12085 | 98.6 | 96.2 | 98.1 |  |                                  | conserved<br>hypothetical protein                                               |
| orf26 | 12099 | 12320 | 88.1 | 98.6 | 100  |  |                                  | hypothetical protein<br>(annotated as gp21<br>in <i>S. aureus</i> H19)          |
| orf27 | 12330 | 12734 | 88.1 | 100  |      |  |                                  | hypothetical protein                                                            |
| orf28 | 12739 | 12924 | 88.7 | 96.8 |      |  |                                  | hypothetical protein                                                            |
| orf29 | 12925 | 13281 | 68.5 | 99.2 |      |  |                                  | hypothetical protein<br>(annotated as gp24<br>in <i>S. aureus</i><br>WW2703/97) |

|       |       |       |      |      |      |      |                        |                                                                                 |
|-------|-------|-------|------|------|------|------|------------------------|---------------------------------------------------------------------------------|
| orf30 | 13285 | 13527 | 92.8 | 100  |      |      |                        | hypothetical protein                                                            |
| orf31 | 13592 | 14041 |      |      |      |      | S .aureus Newman (100) | conserved hypothetical protein belonging to the YopX superfamily                |
| orf32 | 14038 | 14322 | 53.5 |      |      |      | S. aureus D139 (100)   | hypothetical protein                                                            |
| orf33 | 14315 | 14566 | 91.7 | 92.9 | 89.4 | 100  |                        | hypothetical protein                                                            |
| orf34 | 14556 | 14738 |      | 85.2 |      | 100  |                        | hypothetical protein                                                            |
| orf35 | 14731 | 15273 | 81.4 |      | 81.4 | 100  |                        | <b>dUTPase</b>                                                                  |
| orf36 | 15310 | 15555 |      | 100  |      |      |                        | Hypothetical Phage protein                                                      |
| orf37 | 15552 | 15758 | 66.7 | 66.2 | 64.3 | 100  |                        | hypothetical protein                                                            |
| orf38 | 15755 | 16141 |      |      |      | 99.2 |                        | hypothetical protein                                                            |
| orf39 | 16287 | 16487 | 100  | 100  |      | 100  |                        | hypothetical protein                                                            |
| orf40 | 16515 | 16931 |      | 100  |      | 100  |                        | hypothetical protein, annotated as transcriptional regulator RinA in some cases |
| orf41 | 17163 | 17462 |      | 99   |      | 100  |                        | HNH endonuclease family protein                                                 |
| orf42 | 17593 | 17937 |      | 100  |      | 100  |                        | hypothetical protein                                                            |



|       |       |       |      |      |      |      |  |                                                                                                    |
|-------|-------|-------|------|------|------|------|--|----------------------------------------------------------------------------------------------------|
| orf44 | 17934 | 19595 | 36.5 | 98.6 | 45.4 | 100  |  | phage terminase large subunit                                                                      |
| orf45 | 19611 | 20798 |      | 99.7 |      | 99.7 |  | phage portal protein                                                                               |
| orf46 | 20782 | 21519 |      | 99.6 | 47.8 | 99.6 |  | S14 family endopeptidase ClpP                                                                      |
| orf47 | 21543 | 22688 |      | 100  |      | 100  |  | phage major capsid protein                                                                         |
| orf48 | 22708 | 22992 |      | 100  |      | 100  |  | hypothetical protein belonging to the Sec62 superfamily                                            |
| orf49 | 22982 | 23266 |      | 100  |      | 100  |  | hypothetical protein annotated as gp6-like head-tail connector protein in <i>S. aureus</i> ClG1150 |
| orf50 | 23250 | 23612 |      | 100  |      | 100  |  | hypothetical protein, annotated as head-tail adaptor in <i>S. aureus</i> T0131                     |
| orf51 | 23609 | 24013 |      | 100  |      | 100  |  | hypothetical protein, with weak similarities to gp9 from <i>Listeria monocytogenes</i>             |

|       |       |       |      |      |      |      |  |                                                                                                        |
|-------|-------|-------|------|------|------|------|--|--------------------------------------------------------------------------------------------------------|
| orf52 | 24010 | 24417 |      | 100  |      | 100  |  | hypothetical protein,<br>with weak similarities<br>to gp9 from <i>Listeria</i><br><i>monocytogenes</i> |
| orf53 | 24418 | 25062 |      | 99.5 |      | 99.5 |  | phi13 family phage<br>major tail protein                                                               |
| orf54 | 25188 | 25328 |      | 100  |      | 100  |  | hypothetical protein                                                                                   |
| orf55 | 25378 | 25728 |      | 100  |      | 100  |  | hypothetical protein                                                                                   |
| orf56 | 25782 | 25916 |      | 97.8 |      | 100  |  | hypothetical protein                                                                                   |
| orf58 | 25973 | 30517 | 56.6 | 98.7 | 34.7 | 89.8 |  | phage tail tape<br>measure protein                                                                     |
| orf59 | 30514 | 31998 | 93.8 | 90.7 |      | 99.8 |  | putative phage tail<br>component in                                                                    |
| orf60 | 32014 | 35796 | 99.6 | 94.9 |      | 94.1 |  | phage minor<br>structural protein                                                                      |
| orf61 | 35789 | 35941 | 100  | 84.3 |      | 84.3 |  | hypothetical protein                                                                                   |
| orf62 | 35987 | 36274 | 99   | 88.5 |      | 88.5 |  | hypothetical protein                                                                                   |
| orf63 | 36330 | 36704 | 98.4 | 100  |      | 100  |  | hypothetical protein                                                                                   |
| orf65 | 37125 | 37898 |      |      |      | 99.6 |  | enterotoxin type A<br>precursor                                                                        |
| orf66 | 38374 | 38697 | 93.5 | 93.5 | 93.5 |      |  | holin                                                                                                  |
| orf67 | 38708 | 40162 | 98.6 | 97.9 | 97.7 | 20.2 |  | amidase                                                                                                |
| orf69 | 40552 | 41490 | 100  | 100  | 100  |      |  | Panton-Valentine<br>leukocidin chain S<br>precursor                                                    |

|       |       |       |     |     |     |  |  |                                                     |
|-------|-------|-------|-----|-----|-----|--|--|-----------------------------------------------------|
| orf70 | 41492 | 42469 | 100 | 100 | 100 |  |  | Panton-Valentine<br>leukocidin chain F<br>precursor |
|-------|-------|-------|-----|-----|-----|--|--|-----------------------------------------------------|

In the above table, the % similarities for the four named strains (labeled as <sup>a</sup>) are based on Needleman-Wunsch global alignments of orthologs identified using bidirectional best-hit phmmer. An entry is made in the homology to others column (labeled as <sup>b</sup>) if none of the other four named strains have an ortholog with >80% sequence identity; the number entered here is based on blastp searches against the NR database. The annotation in the final column is based on the most informative top hit from a blastp search against the NR database.
